# Supplementary material for: Endogenous retroviruses shape pluripotency specification in mouse embryos
Source: PubMed Central journal article supplement — Sci Adv. 2024 Jan 24;10(4):eadk9394. doi: 10.1126/sciadv.adk9394 (PMC10807815; doi:10.1126/sciadv.adk9394), 2024-01-24
Supplement: sciadv.adk9394_sm.pdf [file sciadv.adk9394_sm.pdf]

Supplementary Materials for  
**Endogenous retroviruses shape pluripotency specification in mouse embryos**

Sergio de la Rosa *et al.*

Corresponding author: Nabil Djouder, ndjouder@cniio.es

*Sci. Adv.* **10**, eadk9394 (2024)  
DOI: 10.1126/sciadv.adk9394

**The PDF file includes:**

Figs. S1 to S9  
Tables S1, S3 and S4  
Legend for table S2

**Other Supplementary Material for this manuscript includes the following:**

Table S2

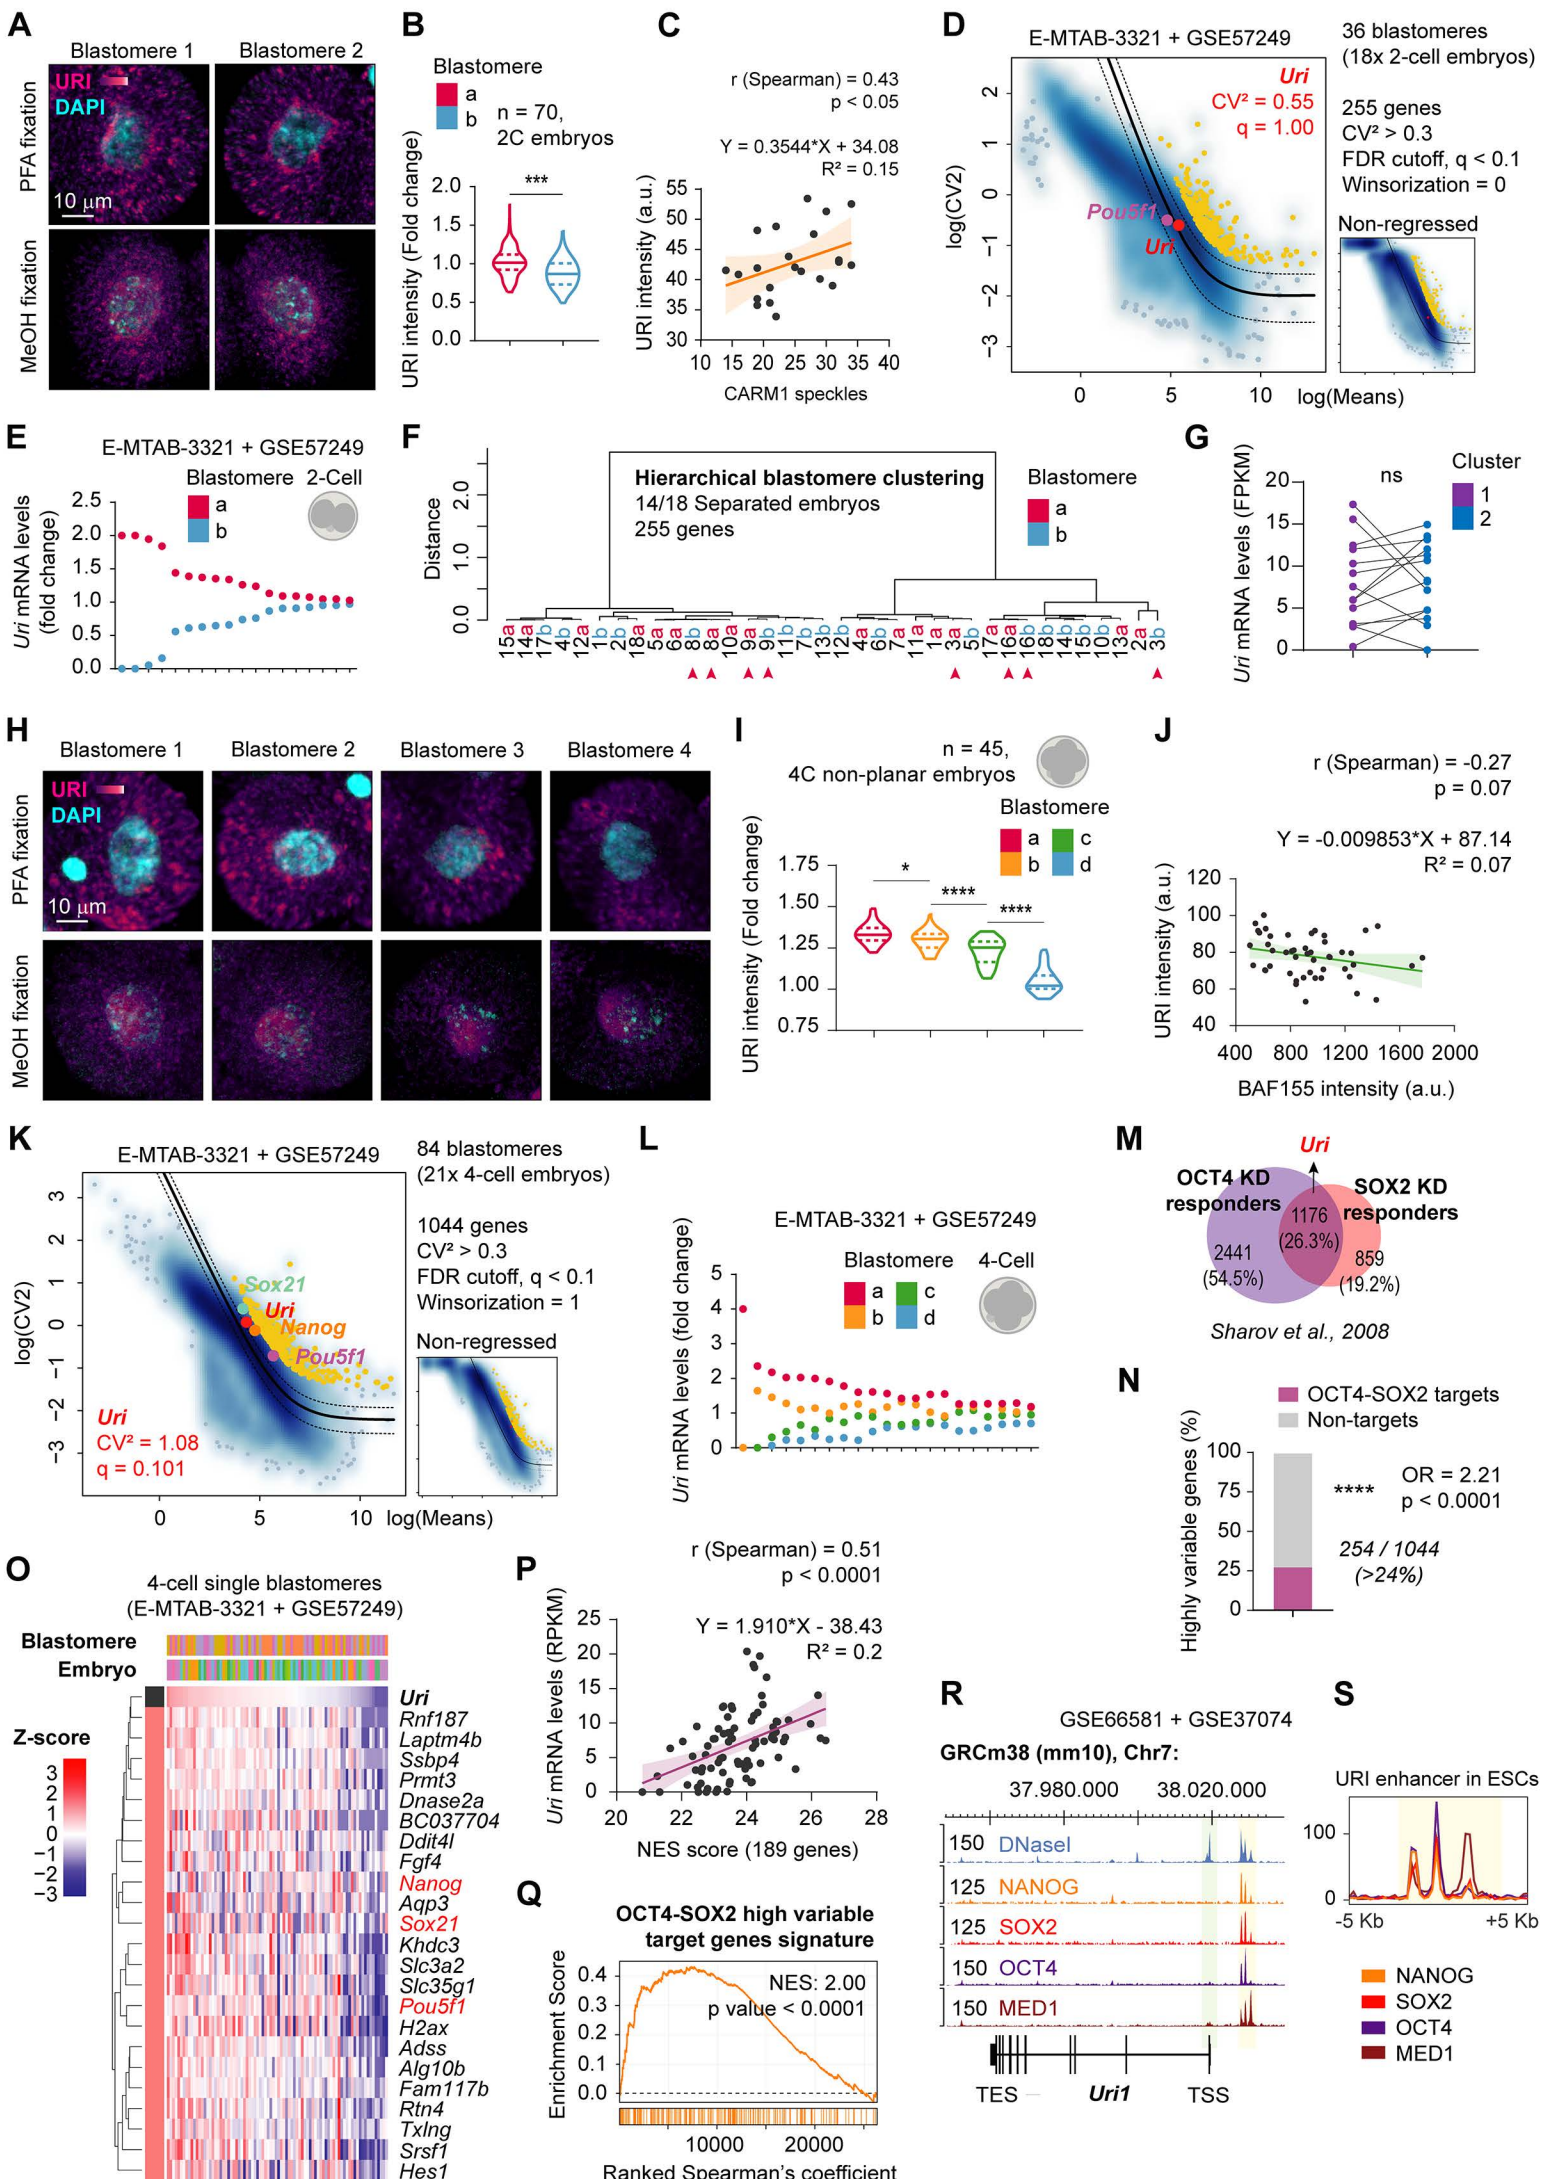

**Fig. S1: URI is heterogeneously expressed and concurs with blastomere pluripotency bias in the early embryo.** **A**, IF of URI in 2C embryos using paraformaldehyde (PFA) or methanol fixation (MeOH). Scale bar, 10  $\mu\text{m}$ . **B**, URI intensity in grouped blastomeres from (A). Unpaired *t* test; \*\*\* $P < 0.001$ . **C**, Linear regression and correlation analysis of URI intensity and CARM1 speckles in 2C embryos (See **Fig. 1D, E**). a.u. acronym referred arbitrary units. **D**, Highly variable gene analysis among single 2C embryo blastomeres. Single cell counts were regressed out for inter-embryo variability, non-regressed plot is also depicted. Mean (solid line) and 95% confidence intervals (dashed line) for the relationship between the square of the coefficient of variation ( $CV^2$ ) and the average gene expression level (Means) are plotted. Yellow dots mark significant genes. Other color dots identify respective genes. **E**, Intra-embryo normalized *Uri* mRNA levels in 2C embryos from single blastomere obtained from indicated RNA-seq datasets. **F**, Hierarchical clustering analysis of single 2C embryo blastomeres using top highly variable gene candidates from (D). **G**, Paired normalized *Uri* mRNA levels in clustered blastomeres from (f). Paired *t* test; ns, non-significant. **H**, IF of URI in 4C embryos using PFA or MeOH fixation. Scale bar, 10  $\mu\text{m}$ . Individual pictures for single blastomeres are shown. **I**, URI intensity for grouped blastomeres from (a). Unmatched one-way ANOVA analysis (Tukey post-hoc test); \* $P < 0.05$ , \*\*\*\* $P < 0.0001$ . **J**, Linear regression and correlation analysis of URI and BAF155 intensity in non-planar shaped 4C embryos (See **Fig. 1, I and J**). a.u. acronym referred arbitrary units. **K**, Gene dispersion analysis among single 4C embryo blastomeres. Single cell counts were regressed out for inter-embryo variability, non-regression plot is also depicted. Mean (solid line) and 95% confidence intervals (dashed line) are plotted for the relationship between the square of the coefficient of variation and ( $CV^2$ ) and the average gene expression level (Means). Yellow dots mark top 300 significant variable genes.

Other color dots identify respective genes. **L**, Intra-embryo normalized *Uri* mRNA levels in 4-cell embryos from single cell blastomere obtained from indicated RNA-seq datasets. **M**, Venn diagram depicting total and shared number of potential target genes for OCT4 and SOX2. **N**, Abundance of OCT4 and SOX2 target genes identified as highly variable genes across 4C embryo blastomeres analysis from (K). Fisher's test is used; \*\*\*\* $P < 0.0001$ . **O**, Heat map showing *Uri*-ranked Z-scored mRNA expression of OCT4 and SOX2 highly variable potential target genes in 4C embryo single blastomeres. **P**, Linear regression and correlation analysis of normalized *Uri* mRNA levels and normalized enrichment score (NES) from Gene set enrichment analysis (GSEA) for OCT4 and SOX2 highly variable potential target gene signature. **Q**, GSEA of ranked gene correlation with *Uri*. **R**, Genomic read coverage of chromatin immunoprecipitation-sequencing analysis (ChIP-seq) in the *Uri* locus for different pluripotent core transcriptional factors. *Uri* locus is shown from the minus strand. Super-enhancer region (yellow band) is identified upstream of the transcription starting site (TSS, green band). **S**, Density plot from panel (R). Total number of embryos is referred to in each panel. Repository accession numbers for sequencing dataset analysis are indicated in respective panel and compiled in **table S1**.



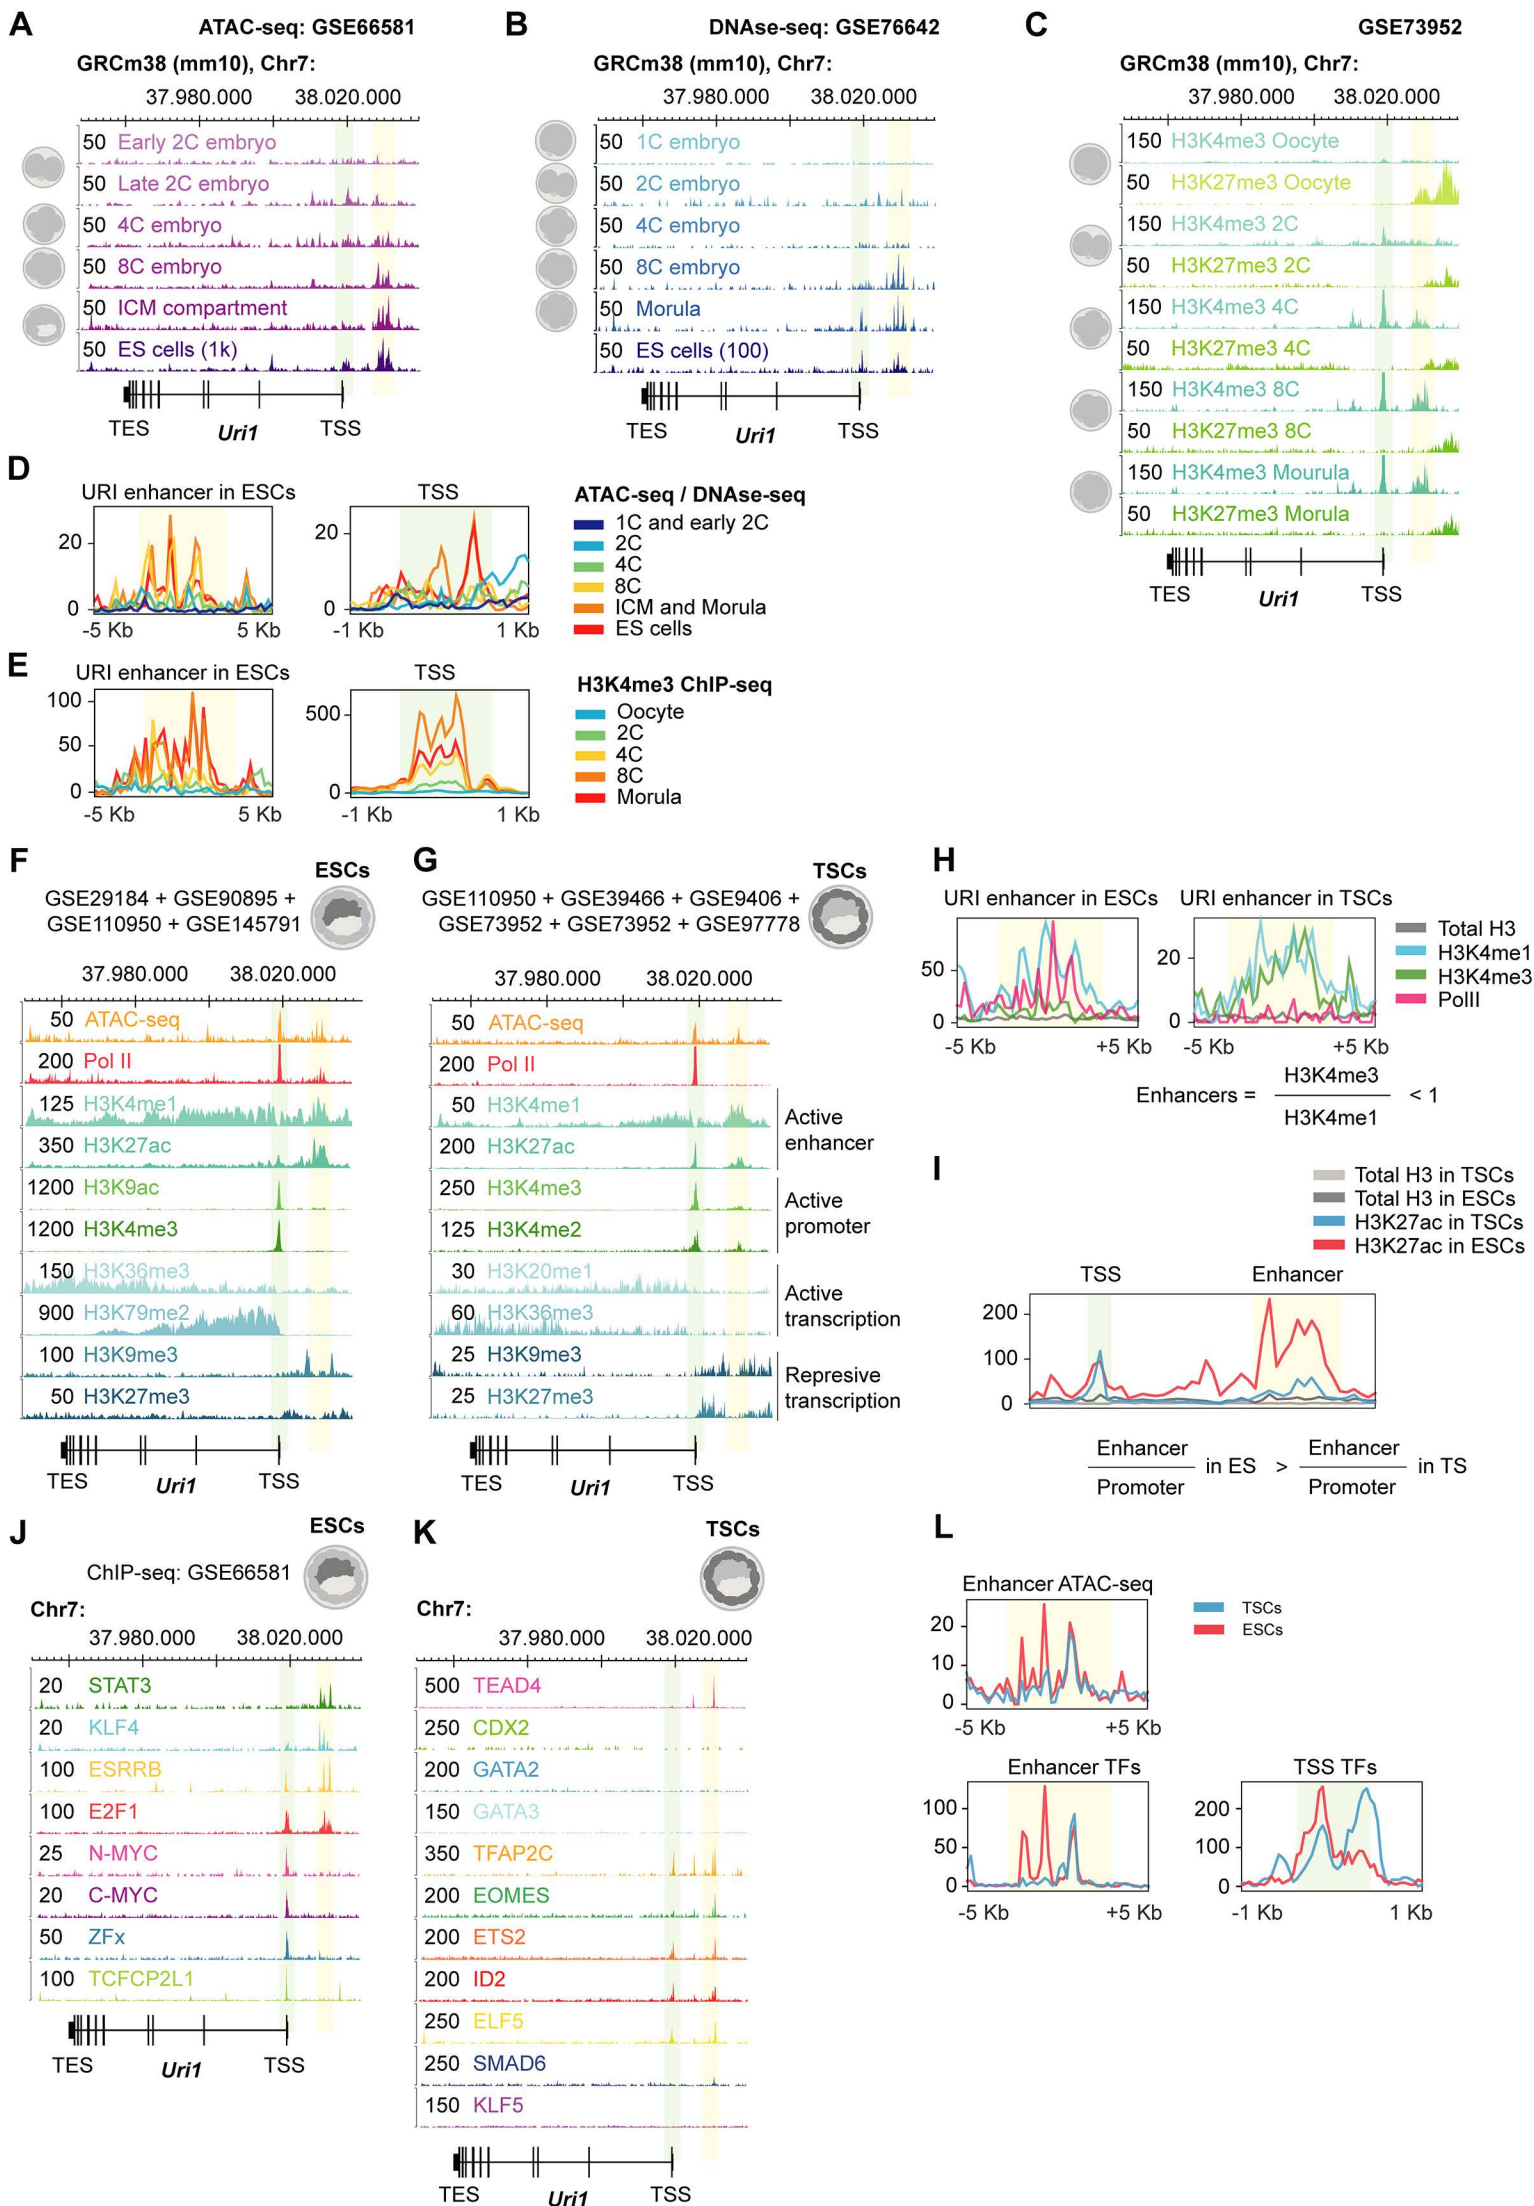

**Fig. S2: *Uri* super-enhancer region encompasses pluripotency onset and lineage segregation in mouse embryos.** **A**, Genomic views of unique mapped reads for transposase-accessible chromatin-sequencing assay (ATAC-seq) across different pre-implanted mouse embryo stages. **B**, Unique read coverage from DNase I-hypersensitive site-sequencing (DNase-seq) along successive pre-implanted mouse embryo stages. **C**, View of mapped reads at *Uri* genomic region from epigenetic chromatin immunoprecipitation-sequencing analysis (ChIP-seq) markers in murine embryos. *Uri* locus is shown from the minus strand. Super-enhancer region (yellow band) is identified upstream of the transcription starting site (TSS, green band). **D**, Density plot from combine read coverages from (A, B). **E**, Density plot of H3K4me3 ChIP-seq from (C). **F** and **G**, Selected genomic views of chromatin immunoprecipitation-sequencing analysis (ChIP-seq) for epigenetic *Uri* locus in pluripotent mESCs (F) or trophoblast stem cells (TSC) (G). *Uri* locus is shown from the minus strand. Enhancer region (yellow band) is identified upstream of the transcription starting site (TSS, green band). **H**, Density plots for H3K27ac ChIP-seq from (F, G). Data showed higher enhancer/promoter ratio in ESCs compared to TSCs. **I**, Density plots for indicated ChIP-seq in ESCs (left) or TSCs (right panel) from (F, G). Enhancers are defined to have high monomethylation at H3K4 (low H3K4me3/H3K4me1 ratio). **J** and **K**, View of unique mapped read coverages from essential transcriptional factor ChIP-seq datasets in ES (J) and TS (K) cells. **L**, Density plots for ATAC-seq and merged transcriptional factor ChIP-seq reads at promoter or enhancer locus in both murine TSCs and ESCs. Acronyms for 1C (1-cell embryo), 2C (2-cell embryo), 4C (4-cell embryo), 8C (8-cell embryo), ICM (Inner Cell Mass compartment) and ES (Embryonic Stem cell) are used. Repository accession numbers for sequencing dataset analysis are indicated in respective panel and compiled in **table S1**.

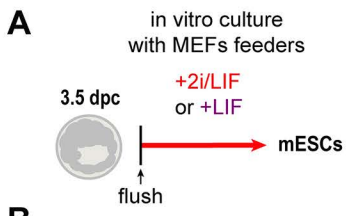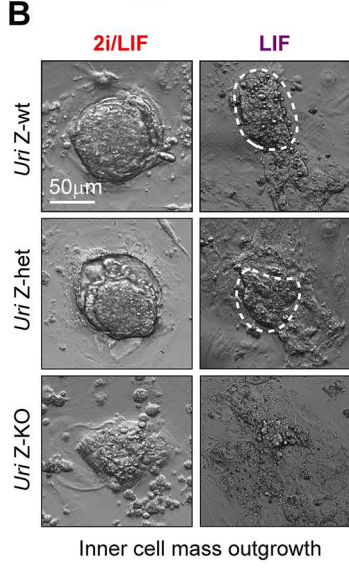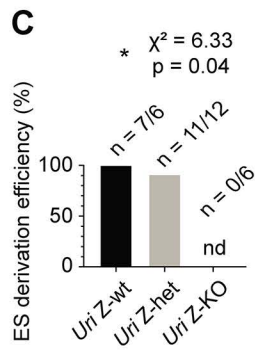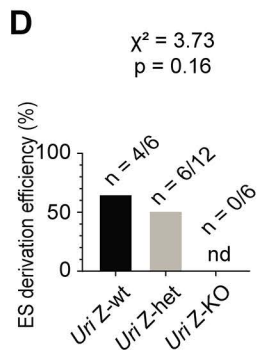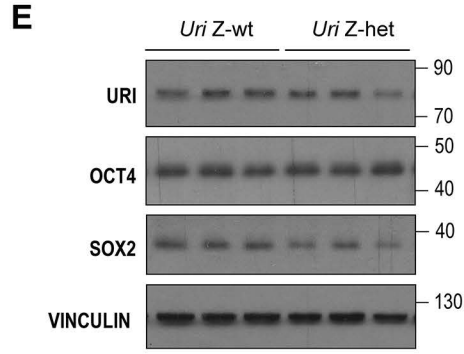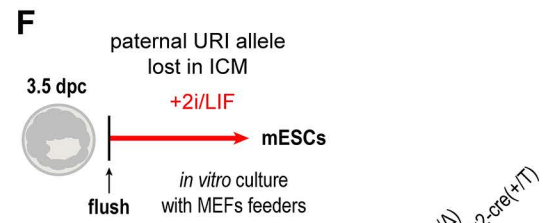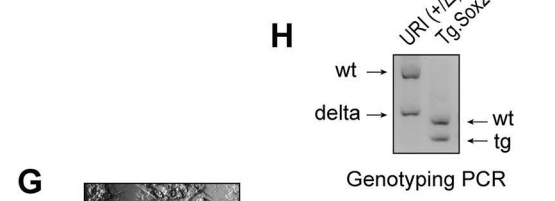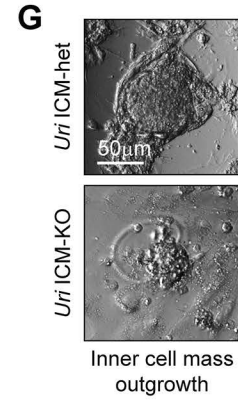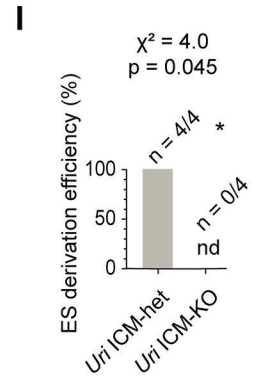

**Fig. S3: Zygotic URI-depleted embryos do not establish mESCs cultures.** **A**, Pluripotent ESC derivation protocol from early pre-implanted blastocyst, placed *in vitro* in feeder gelatin-coated layer in the presence of leukemia inhibitory factor (LIF) and the addition of 2i (GSK3 and MEK inhibitors) from (See **Fig. 3, A and B**). **B**, Representative bright field images of ICM outgrowths 5 days after plating embryos *ex vivo* in the presence of 2i/LIF or LIF from (A). White dashed lines limit ICM outgrowth in LIF condition. Scale bars, 50  $\mu\text{m}$ . **C**, Efficiency of mESCs lineage derivation from (B) under 2i/LIF condition.  $\chi^2$  test applied for the expected versus observed events;  $*P < 0.05$ . **D**, Efficiency of mESCs lineage derivation from (B) under LIF condition.  $\chi^2$  test applied for the expected versus observed events; ns, non-significant. **E**, Western blot analysis of established pluripotent cell lineages from (B). **F**, Pluripotent ESC derivation protocol of *Uri* ICM-KO embryos generated by crossing the *Sox2*-Cre mice with the *Uri* lox mouse model to generate URI heterozygous (ICM-het) and knockout (ICM-KO) embryos (See **Fig. 3, P and Q**). **G**, Representative bright field images of ICM outgrowths from embryos cultured *ex vivo* in the presence of 2i/LIF from (F). Scale bars, 50  $\mu\text{m}$ . **H**, Representative DNA electrophoresis of PCR data for the genotyping of derived pluripotent cell lineage from (G). **I**, Efficiency of mESCs lineage derivation from (G).  $\chi^2$  test applied for the expected versus observed events. Total number of embryos is referred to in each panel.



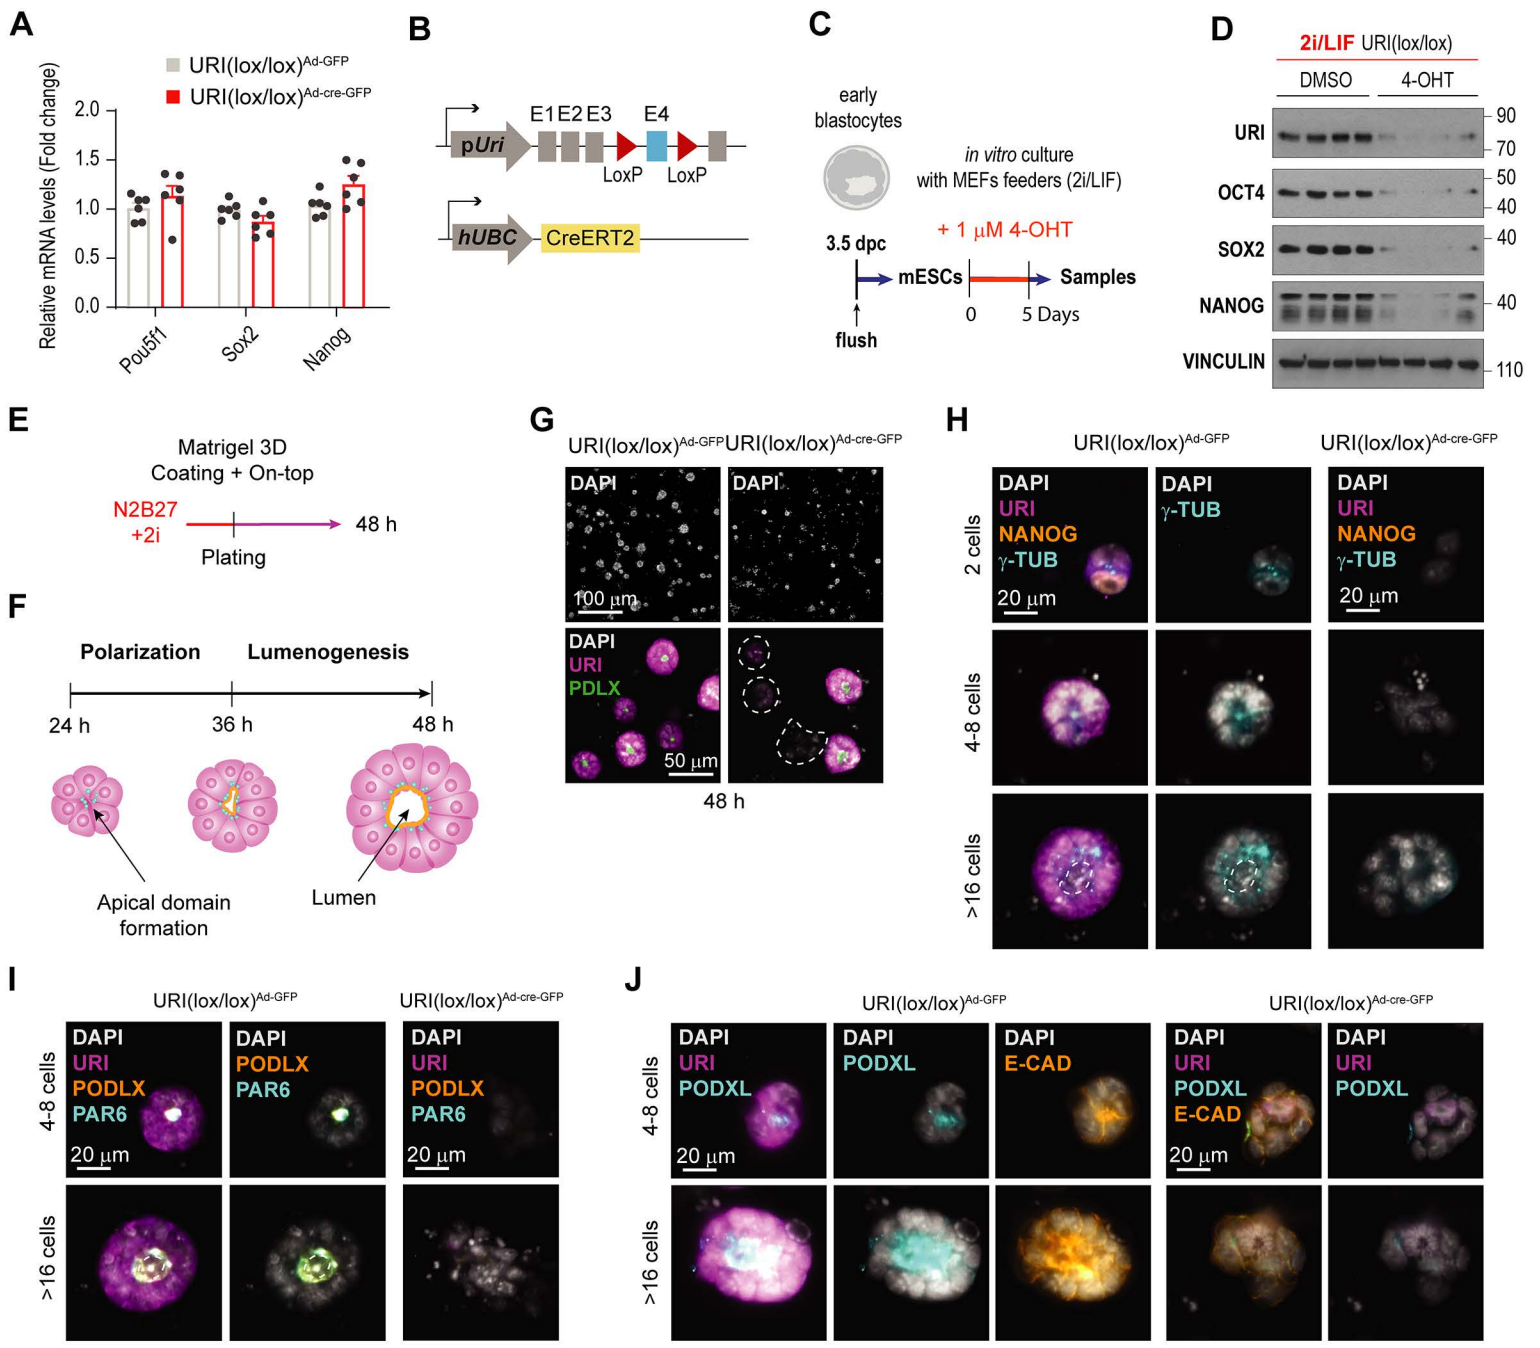

**Fig. S4: URI loss compromises the pluripotent potential of EPI cells.** **A**, qRT-PCR of pluripotent core factor genes in mESCs treated with adenoviruses expressing either Cre recombinase combined with an enhanced green fluorescence protein EGFP (AdV-Cre-EGFP) or EGFP alone (AdV-EGFP) as control and cultured in presence of 2i/LIF. Data are represented as mean  $\pm$  s.e.m. **B**, Scheme of *Uri* lox mice crossed with *hUBC-CreERT2* mice. **C**, Murine ESCs derivation protocol from early pre-implanted blastocyst from (B), placed *in vitro* in feeder layer in the presence of 2i/LIF and treated with 4-hydroxytamoxifen (4-OHT) to deplete URI *in vitro*. **D**, Western blot analysis of 4-OHT-treated pluripotent mESCs from (C). **E**, Experimental scheme to generate rosette-like structure mimicking post-implanted epiblast (EPI) compartment. **F**, Scheme of the main morphological changes of the embryonic EPI compartment during implantation. **G**, IF of URI and PODLX in AdV-EGFP- or AdV-Cre-EGFP-infected rosette-like mESCs after 48 hours. Dashed white lines indicate URI negative colonies. Scale bar, 100 and 50  $\mu$ m. **H**, Representative IF of URI, naïve pluripotent marker NANOG and the polarization marker  $\gamma$ -TUBULIN in different size rosette-like colonies. Scale bar, 20  $\mu$ m. **I**, Representative IF of URI and lumenogenesis markers PODLX and PAR6 in different size rosette-like colonies. Scale bar, 20  $\mu$ m. **J**, IF of URI, PODLX and the epithelial marker E-Cadherin in different size rosette-like colonies. Scale bar, 20  $\mu$ m.

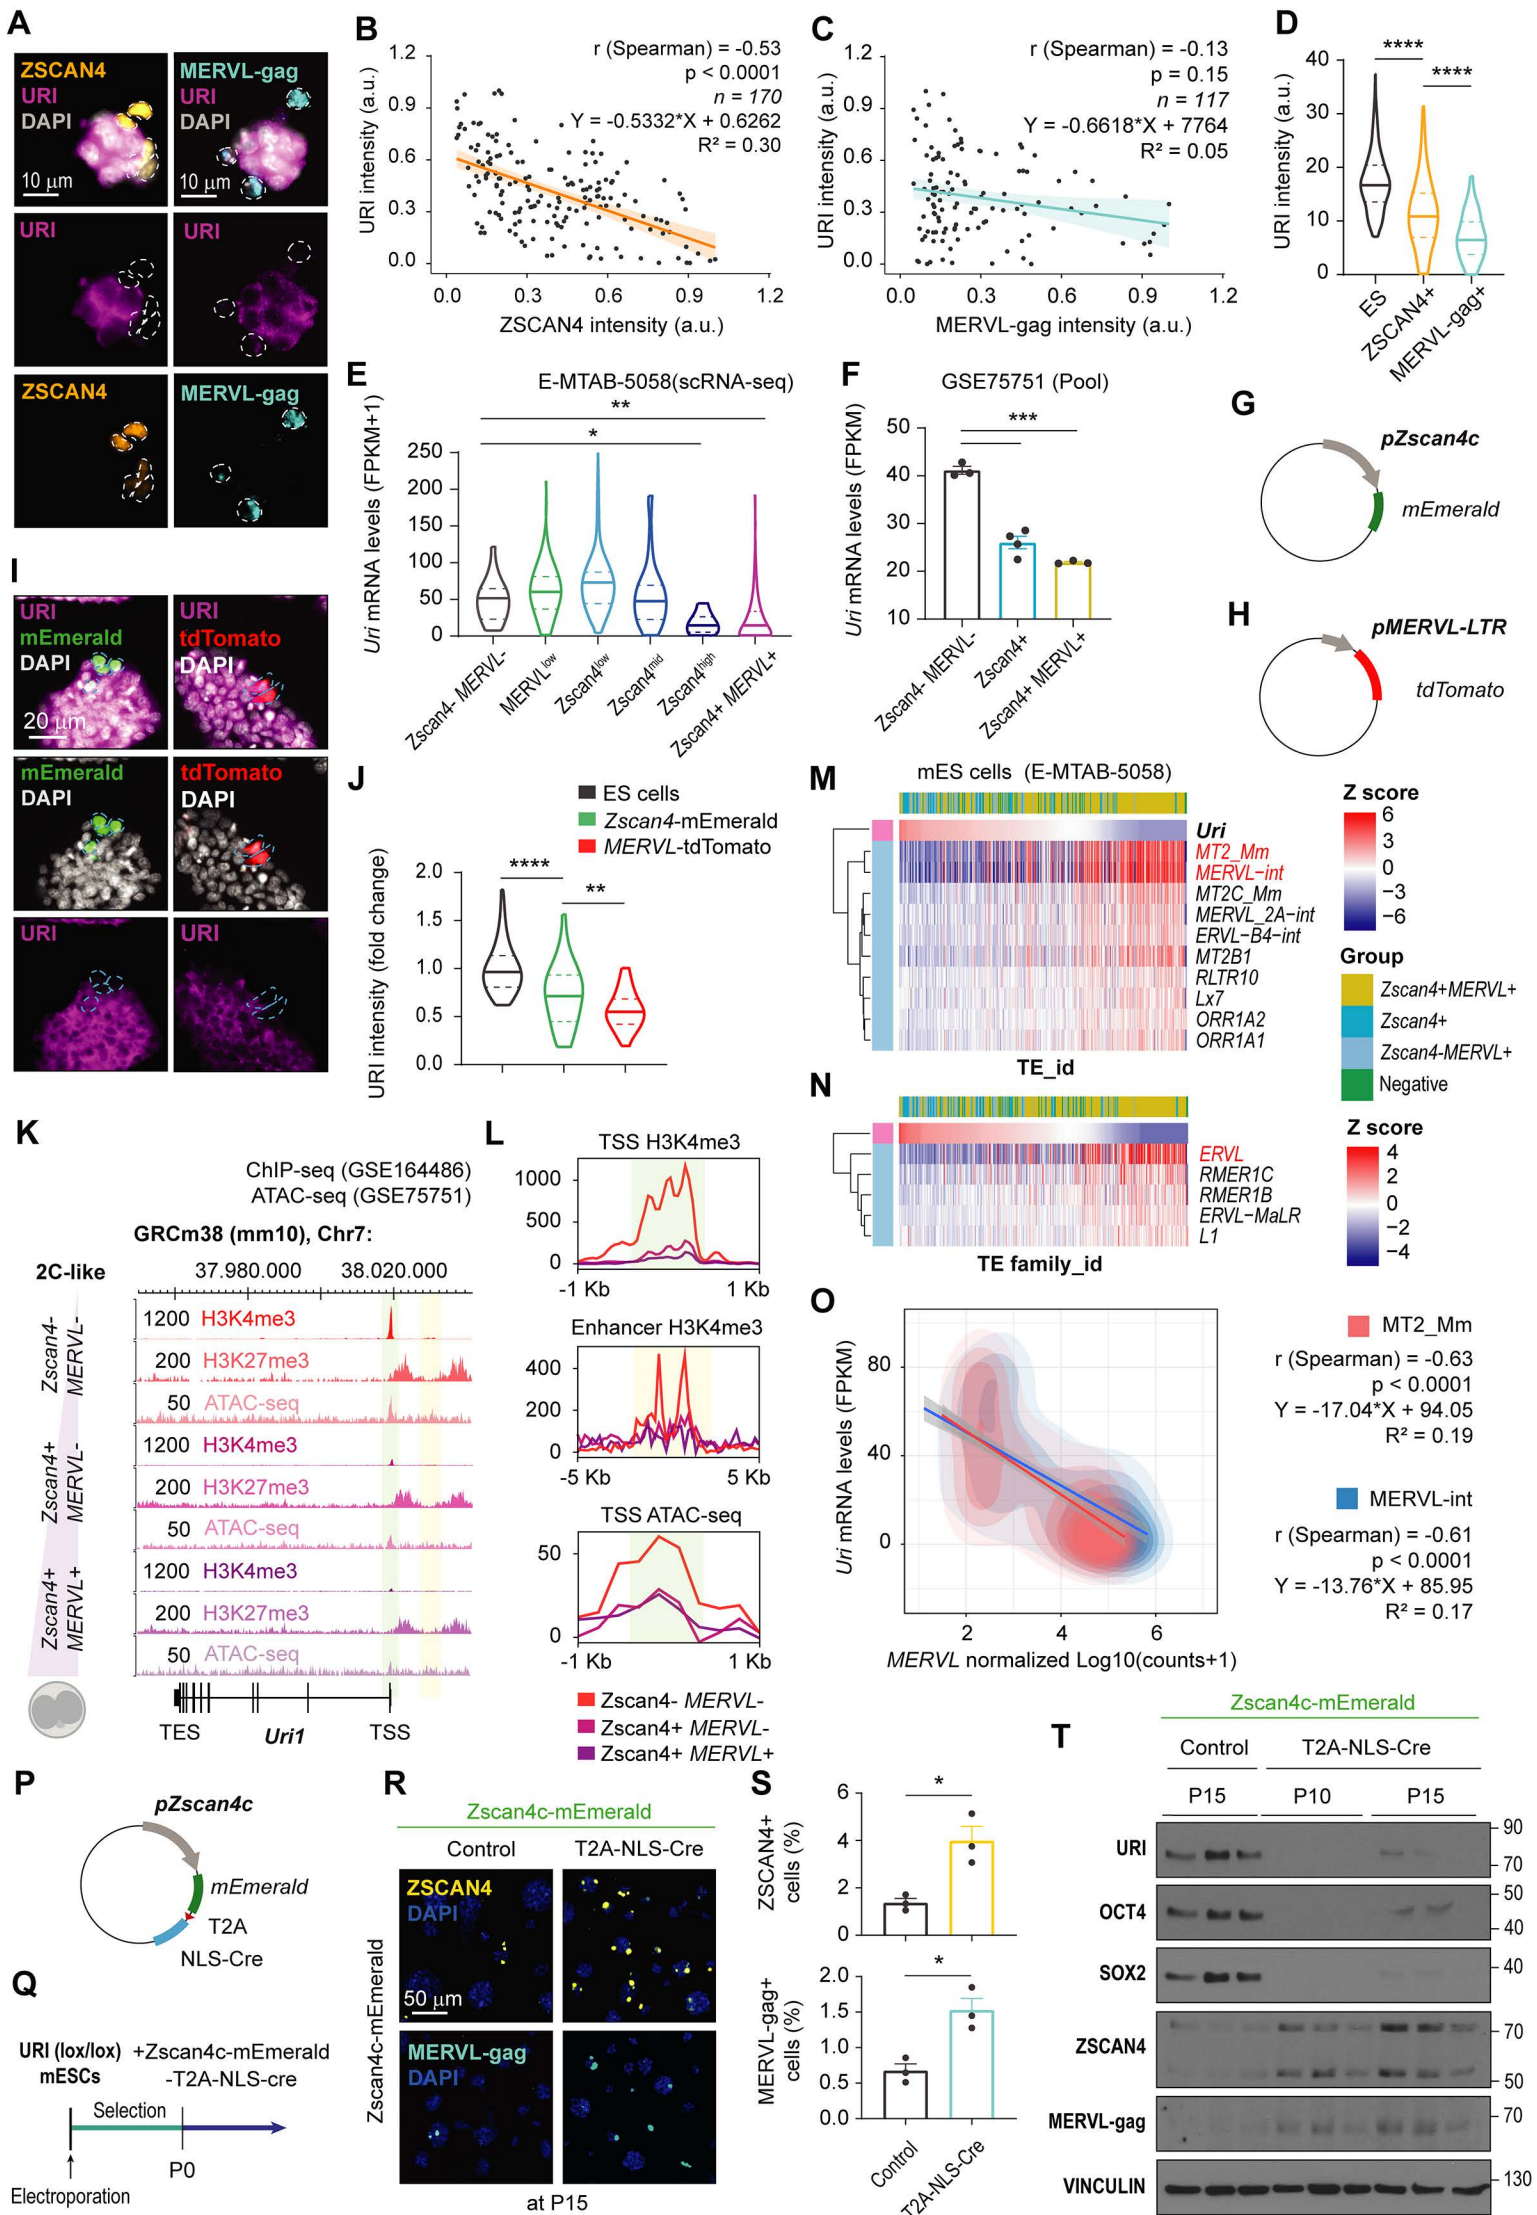

**Fig. S5. URI loss is a hallmark of the 2C-like cells.** **A**, IF of wild-type mESCs for URI and the 2C-like markers ZSCAN4 or MERVL-gag. Dashed white outlines represent totipotent-like cells. Scale bar, 10  $\mu$ m. **B** and **C**, Linear regression model and normalized correlation analysis of URI and ZSCAN4 (**B**) or MERVL-gag (**C**) intensity from (**A**). Results are plotted as arbitrary units (a.u.). **D**, URI levels of pluripotent mESCs and the two totipotent-like ZSCAN4<sup>+</sup> or MERVL-gag<sup>+</sup> cells from (**B** and **C** respectively). a.u. acronym referred arbitrary units. One-way ANOVA test (Tukey post-hoc test); \*\*\*\* $P < 0.0001$ . **E**, Normalized *Uri* mRNA expression levels across different pluripotent or 2C-like cell populations from single cell RNA-seq datasets. *x* axis is sorted left-to-right from pluripotent population (*Zscan4*<sup>-</sup>; *MERVL-LTR*<sup>-</sup>) to totipotent-like cells (*Zscan4*<sup>+</sup>; *MERVL-LTR*<sup>+</sup>). Median and quartiles are shown. One-way ANOVA test (Tukey post-hoc test); \* $P < 0.05$ , \*\*\* $P < 0.001$ . **F**, Normalized *Uri* mRNA expression across different pluripotent or 2C-like populations from a pooled RNA-seq dataset. One-way ANOVA test (Tukey correction); \*\*\* $P < 0.001$ . **G**, Plasmid construct for labelling transient 2C-like cells with active transcription of the *Zscan4c* promoter. **H**, Plasmid construct for labelling transient 2C-like cells with active transcription of the MERVL-LTR promoter. **I**, IF of URI in 2C-like *Zscan4*-mEmerald or MERVL-LTR-tdTomato reporter mESCs. Scale bar, 20  $\mu$ m. Median and quartiles are shown. **J**, URI intensity in wild-type ES, *Zscan4*<sup>+</sup> or *MERVL-LTR*<sup>+</sup> cells from (**I**). ANOVA with Tukey post hoc test; \*\* $P < 0.01$ , \*\*\*\* $P < 0.001$ . **K**, Selected genomic views from chromatin-immunoprecipitation sequencing (ChIP-seq) of H3K4me3 and H3K27me3 and assay for transposase-accessible chromatin (ATAC-seq) in different pluripotent (*Zscan4*<sup>-</sup>; *MERVL-LTR*<sup>-</sup>) or totipotent-like (*Zscan4*<sup>+</sup>; *MERVL-LTR*<sup>-</sup> and *Zscan4*<sup>+</sup>; *MERVL-LTR*<sup>+</sup>) cell populations. *Uri* locus is shown from the minus strand. Super-enhancer region (yellow band) is identified upstream of the transcription starting site (TSS, green band). **L**, Density plots

for H3K4me3 ChIP-seq and ATAC-seq at the specified regions from (L). **M** and **N**, Heat map showing *Uri*-ranked Z-scored mRNA expression of transposable elements clustered per element (M) or family (N) repeats from single pluripotent and totipotent-like cell RNA-seq datasets. **O**, Linear regression model and correlation analysis of normalized URI and *MERV1-LTR* (MT2\_Mm) (red) or *MERV1-int* (blue) counts from (M and N). **P**, Plasmid construct for depleting URI in 2C-like cells under the ZSCAN4c promoter. **Q**, Scheme of the timing for URI depletion in 2C-like cells by electroporating plasmid from (P). **R**, IF of mESCs for the totipotent-like marker ZSCAN4 or MERV1-gag in long term culture 2C-like dependent URI depleted cells after 15 passages (P15). Scale bar, 50  $\mu$ m. **S**, Abundance of 2C-like cells from (R) after P15. Data is represented as mean  $\pm$  s.e.m. *t* test analysis; \**P* < 0.05. **T**, Western blot analysis of post-electroporated mESCs at indicated number of passages as reported in panel (Q). Repository accession numbers for sequencing dataset analysis are indicated in respective panel and compiled in **table S1**.



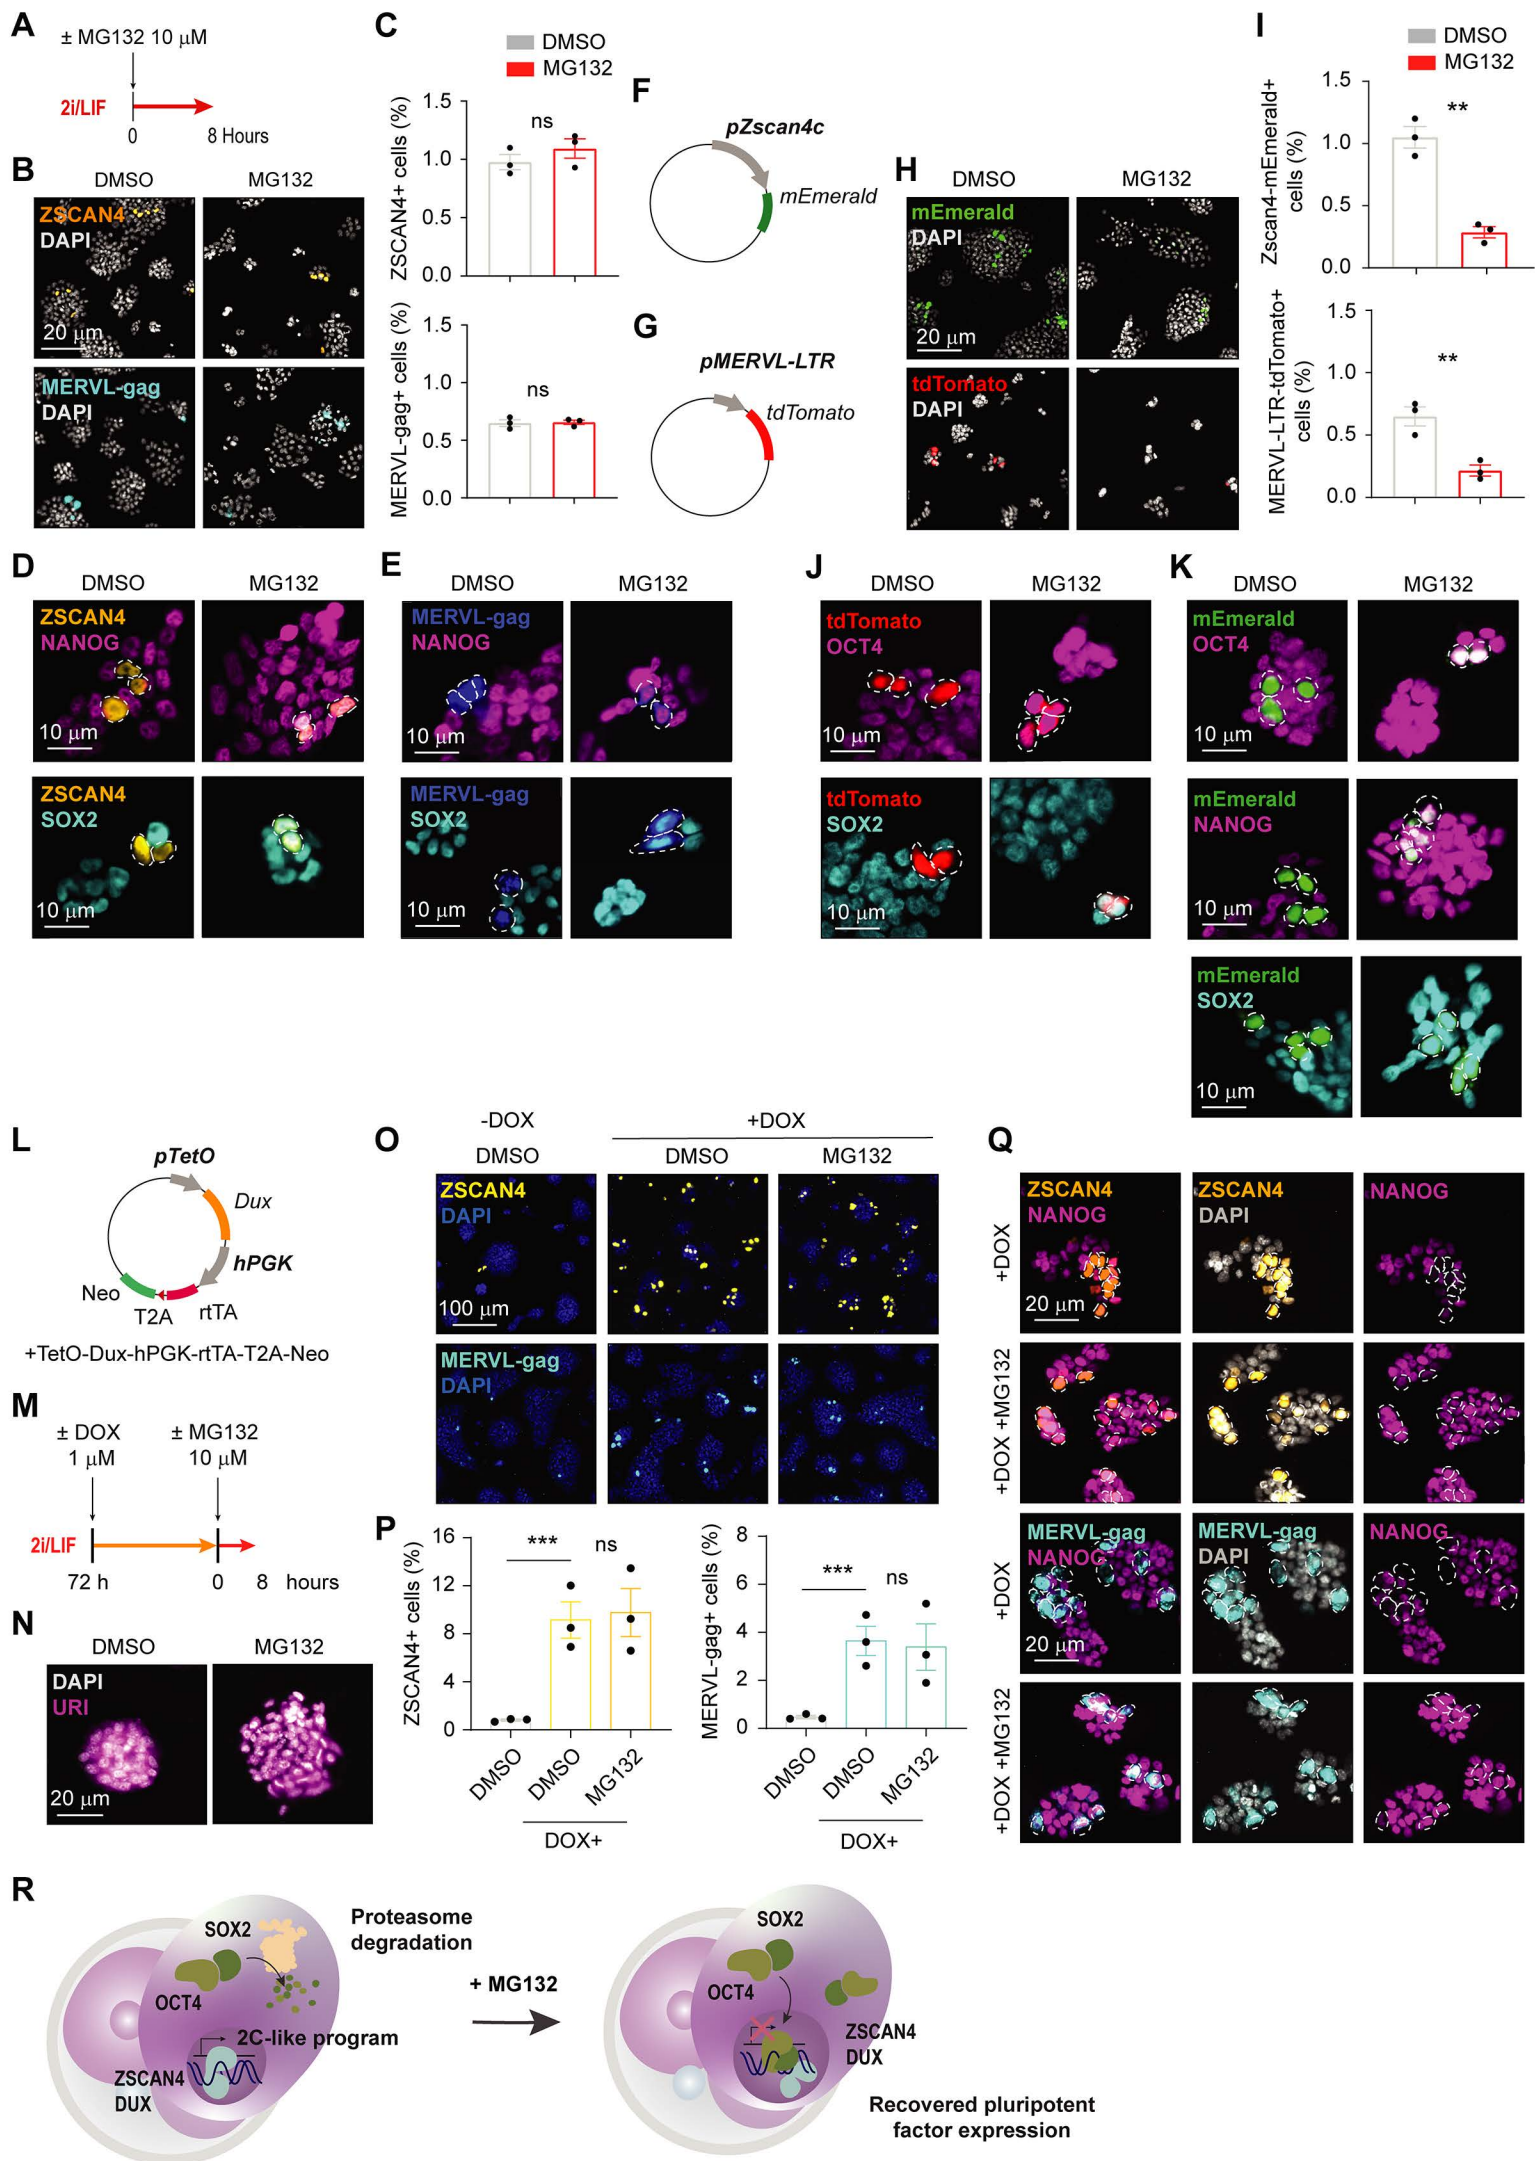

**Fig. S6. Proteasome inhibition reinstates the expression of the pluripotent core factors in the totipotent-like cells.** **A**, Experimental scheme of mESCs treated with 10  $\mu$ M of MG132 for 8 hours. **B**, IF of ZSCAN4 or MERVL-gag in MG132-treated mESCs. Red arrowheads mark positive 2C-like cells. Scale bar, 20  $\mu$ m. **C**, Abundance of 2C-like cells in MG132-treated ZSCAN4 (up) or MERVL-gag (bottom) positive cells from (B). Data is represented as mean  $\pm$  s.e.m. *t* test was applied; ns, non-significant. **D** and **E**, IF of pluripotent NANOG and SOX2 in ZSCAN4 (D) or MERVL-gag (E) positive cells before and after MG132 treatment. Dashed white outlines show 2C-like cells. Scale bar, 10  $\mu$ m. **F** and **G**, Plasmid constructs and experimental scheme of mESCs stably transfected with *Zscan4*-mEmerald (F) or *MERVL-LTR*-tdTomato (G) constructs and treated with the proteasome inhibition MG132. **H**, Fluorescence of endogenous signal for the respective reporter in mESCs treated as described in (A). Scale bar, 20  $\mu$ m. **I**, Abundance of 2C-like cells in MG132-treated *Zscan4*-mEmerald (top) or *MERVL-LTR*-tdTomato (bottom) models from (H). Data is represented as mean  $\pm$  s.e.m. *t* test was applied; \*\**P* < 0.01. **J** and **K**, IF of pluripotent OCT4, SOX2 and NANOG in MG132-treated 2C-like *MERVL-LTR*-tdTomato (J) or *Zscan4c*-mEmerald (K) reporter cell lines. **L**, Plasmid construct for inducible DUX expression to induce 2C-like state after electroporation in mESCs. **M**, Experimental scheme for mESCs cultured in 2i/LIF and treated first with doxycycline (DOX) to induce expression of DUX, and then with MG132 to inhibit proteasome. **N**, IF of URI in MG132-treated mESCs. Scale bar, 20  $\mu$ m. **O**, IF of ZSCAN4 and MERVL-gag in mESCs from (M). Scale bar, 100  $\mu$ m. **P**, Abundance of ZSCAN4 (left) and MERVL (right) positive cells from (O). **Q**, IF of pluripotent NANOG in DUX-induced 2C-like cells treated with MG132 from (M). Scale bar, 20  $\mu$ m. **R**, Scheme depicting the pluripotent core factors reinstatement in totipotent-like cells after proteasome inhibition. Total number of embryos is referred in each panel.

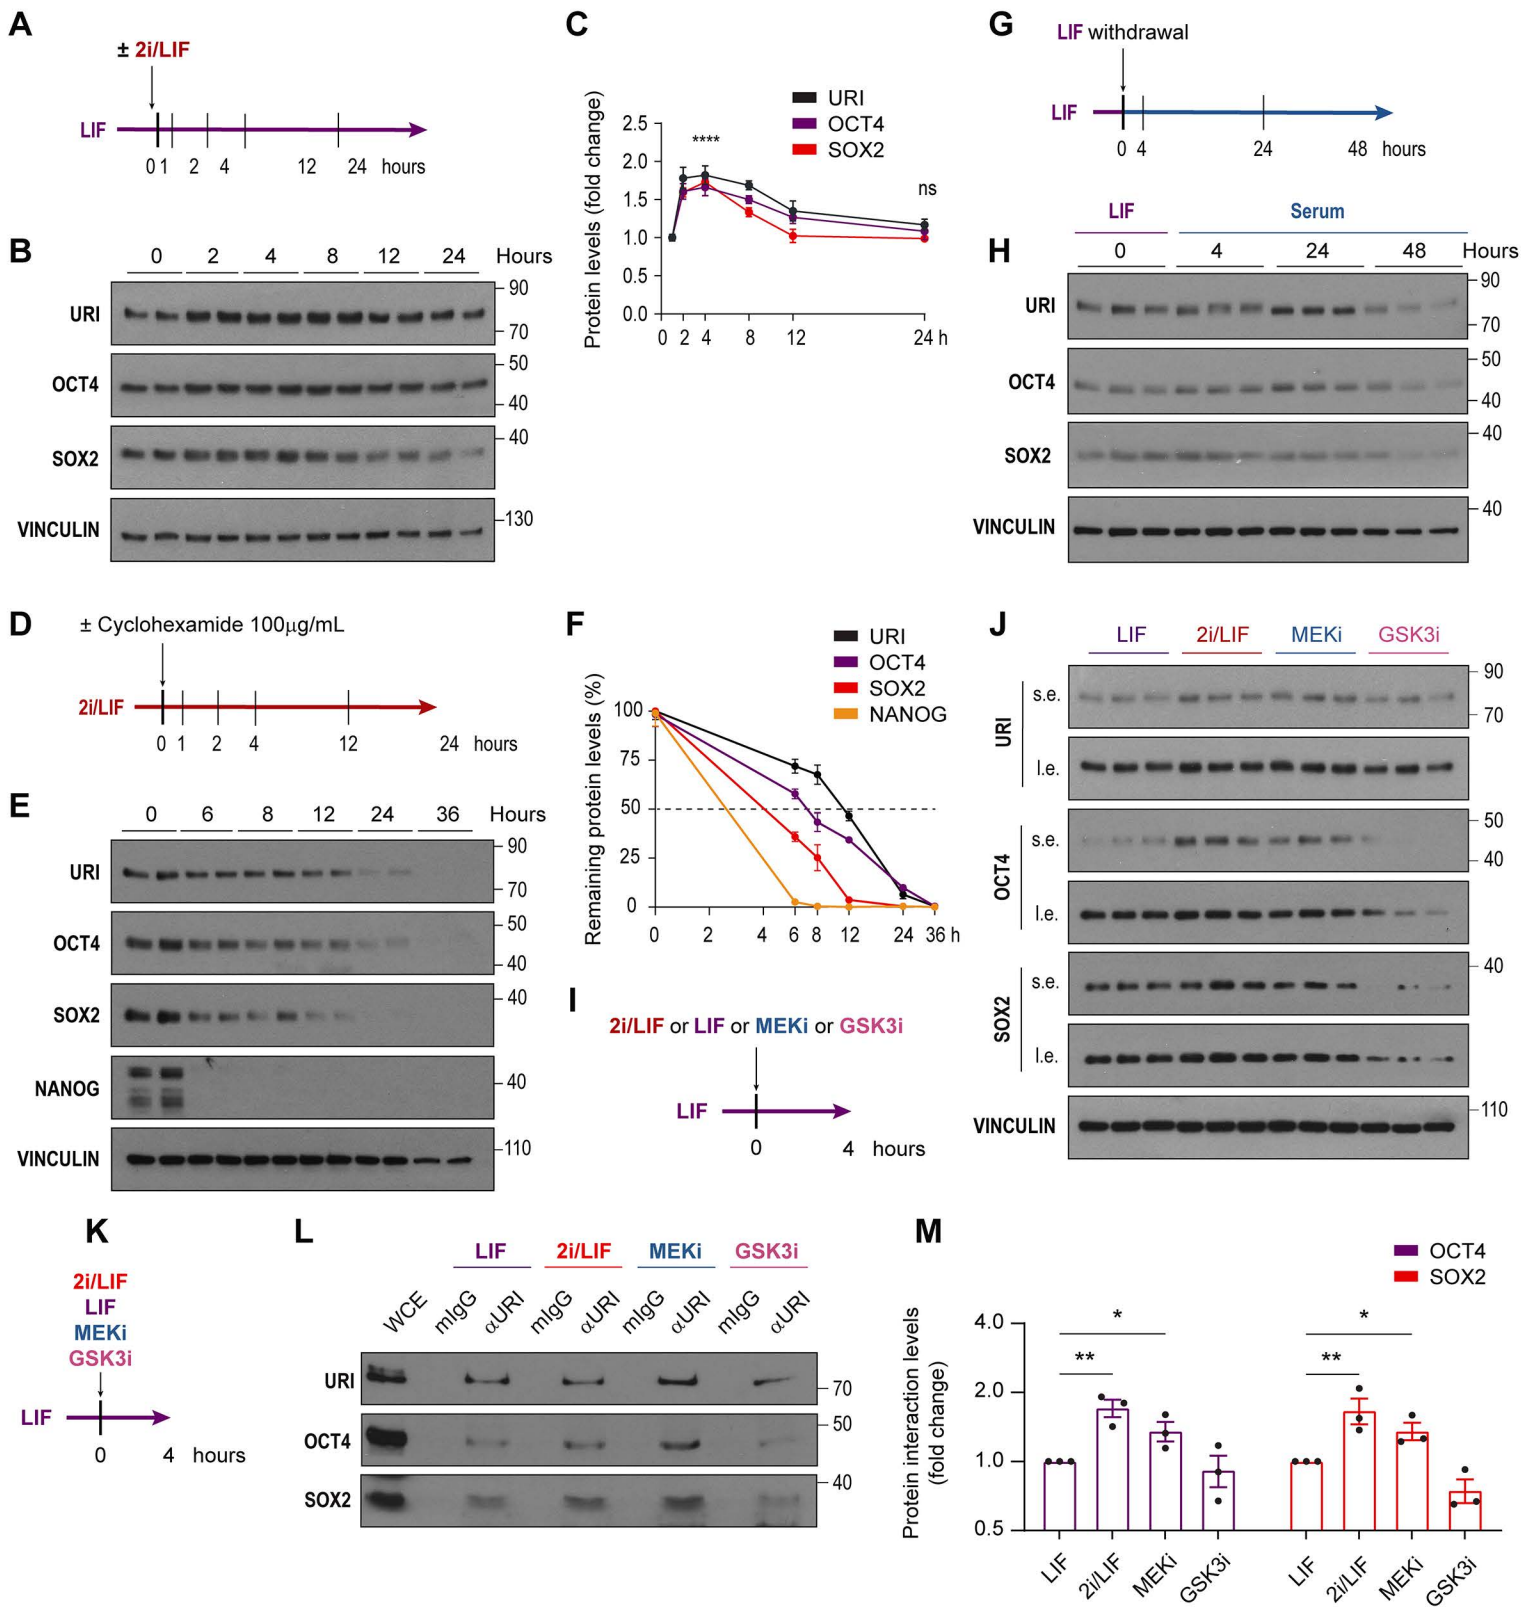

**Fig. S7. URI interacts with OCT4 and SOX2 under naïve pluripotency conditions.**

**A**, Experimental scheme of induction of pluripotent naïve state by addition of 2i/LIF overtime in mESCs cultured *in vitro*. **B**, Western blot (WB) analysis of naïve pluripotency induced following 2i/LIF treatment from (A). **C**, Protein levels of URI, OCT4 and SOX2 normalized to starting timepoint from (B). Data is represented as mean  $\pm$  s.e.m. one-way ANOVA (Tukey post-hoc test); \*\*\*\* $P < 0.0001$ ; ns, non-significant. **D**, Experimental scheme of protein turnover analysis by treating mESC with cyclohexamide overtime. **E**, WB analysis from experiment described in (D). **F**, Protein levels of URI, OCT4 and SOX2 normalized to starting timepoint from (E). **G**, Experimental scheme of LIF withdrawal over time in mESCs cultured *in vitro* to induce differentiation or pluripotency shutdown. **H**, WB analysis from the experiment described in (G). **I**, Experimental scheme of treatment with either 2i/LIF, LIF alone, MEKi/LIF or GSK3i/LIF in mESCs during 4 hours. **J**, WB analysis from experiment described in (I). **K**, Experimental scheme of mESCs culture in presence of either 2i, 2i/LIF, MEK inhibitor (MEKi) or GSK3 inhibitor (GSK3i) during 4 hours. **L**, Co-immunoprecipitation of URI in mESCs treated as described in (K). **M**, Interaction levels of URI with OCT4 or SOX2 in different medium conditions normalized to pulldown abundancy. One way ANOVA test (Tukey post-hoc test); \* $P < 0.05$ , \*\* $P < 0.01$ ; ns, non-significant.



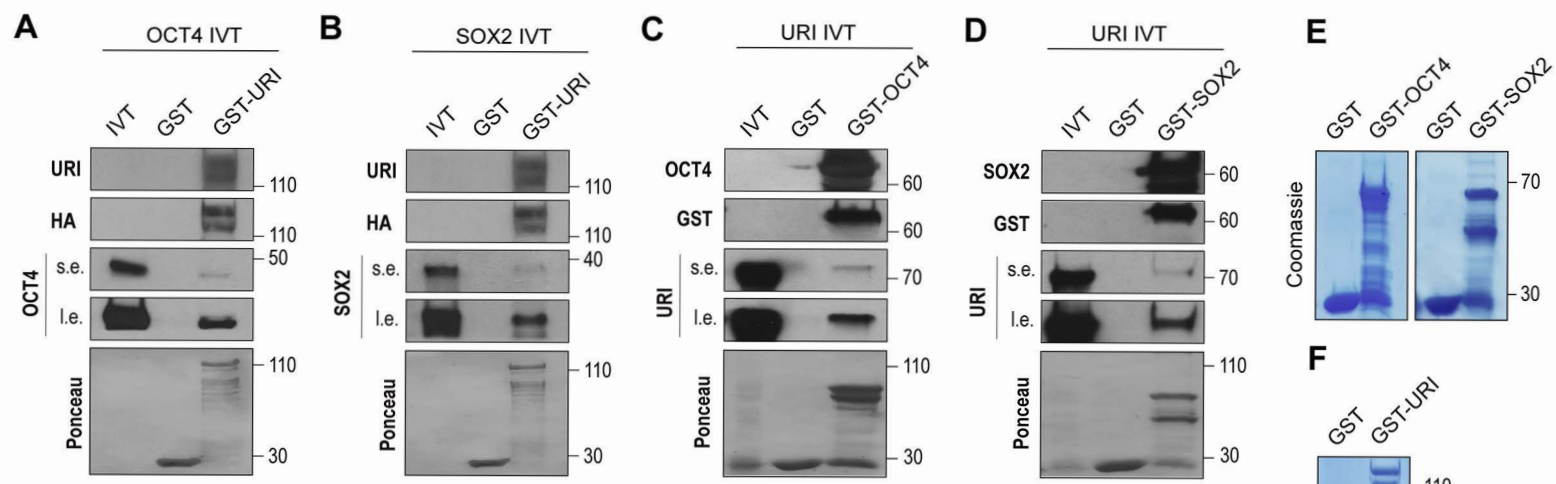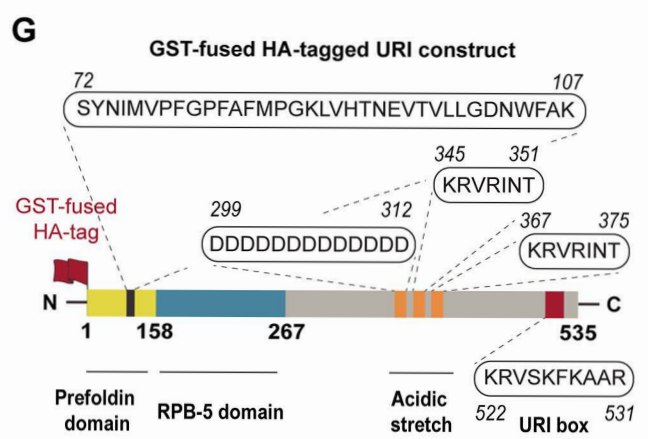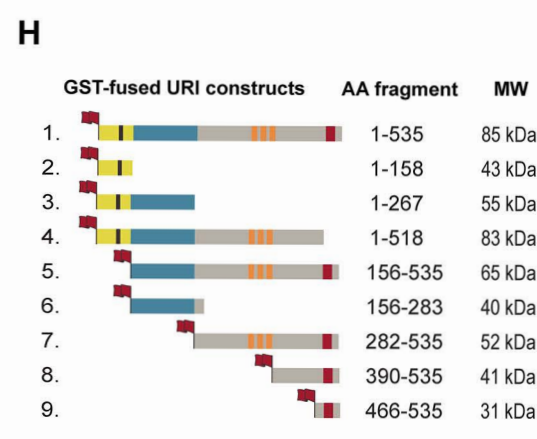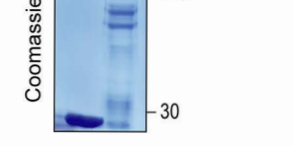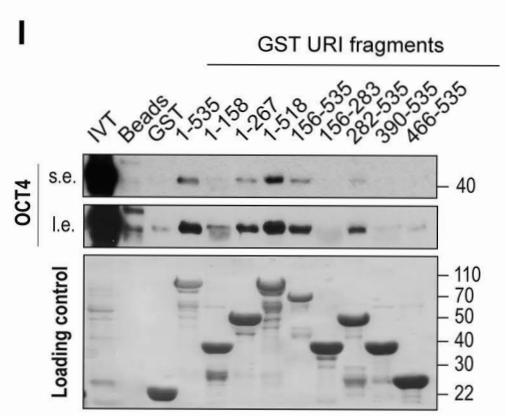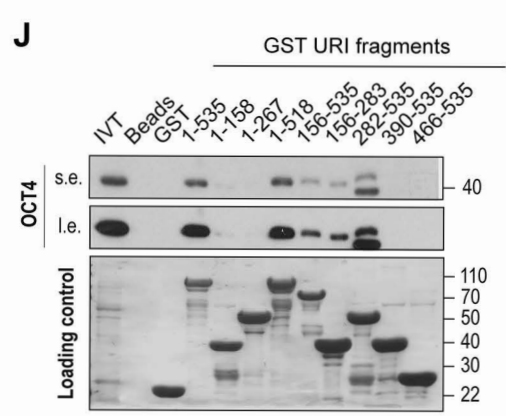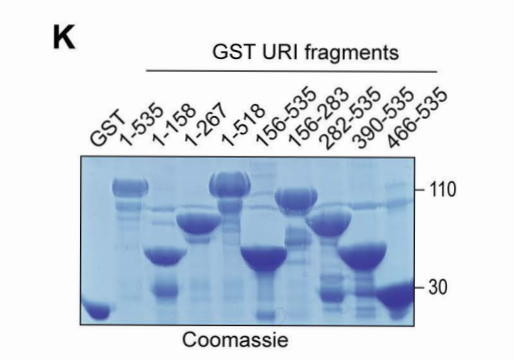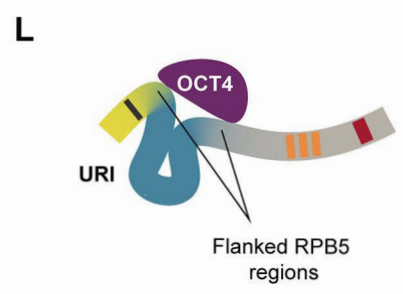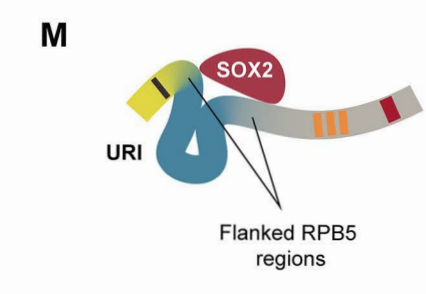



**Fig. S8. URI interacts with OCT4 and SOX2 through RPB5 flanking binding sites. A and B,** Pulldown of *in vitro* translation (IVT) OCT4 (A) and SOX2 (B) protein using GST or GST-URI. s.e. and l.e. exposures are shown. **C and D,** Pulldown of IVT URI protein using GST, GST-OCT4 (C) or GST-SOX2 (D). s.e. and l.e. exposures are shown. **E,** Coomassie blue staining for purified OCT4 and SOX2 GST-fused proteins. **F,** Coomassie blue staining for purified URI GST-fused protein. **G,** Scheme of URI protein domains and amino acid sequences. **H,** GST-fused URI constructs strategy for pull down experiments. **I,** and **J,** Pulldown of OCT4 (I) or SOX2 (J) IVT using GST-fused URI fragments from (H). **K,** Coomassie blue staining for purified URI GST-fused fragments from (H). **L** and **M,** Scheme representing the binding regions of OCT4 (L) and SOX2 (M) on URI protein.

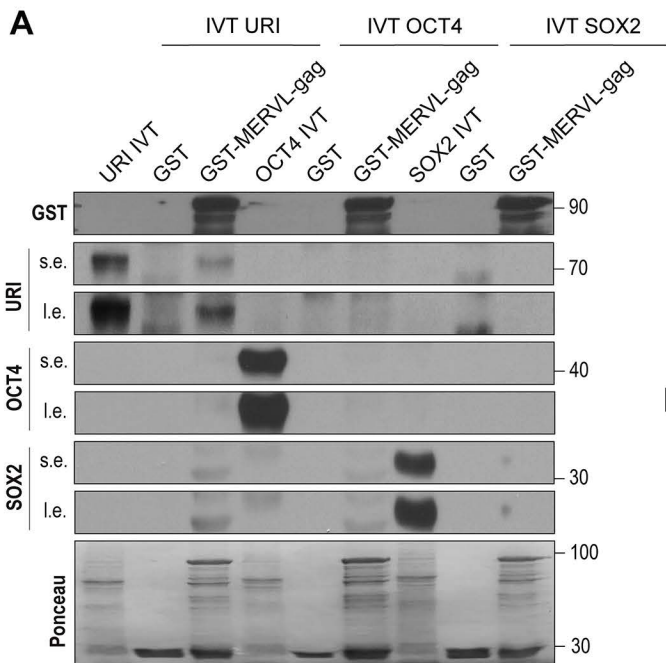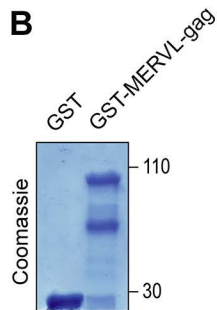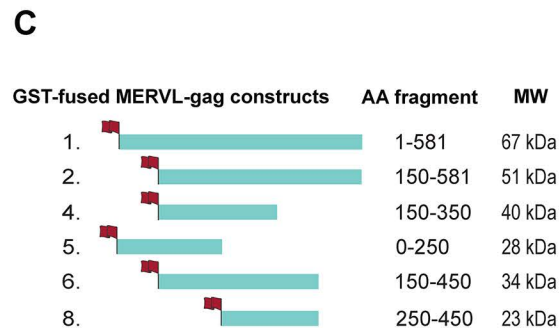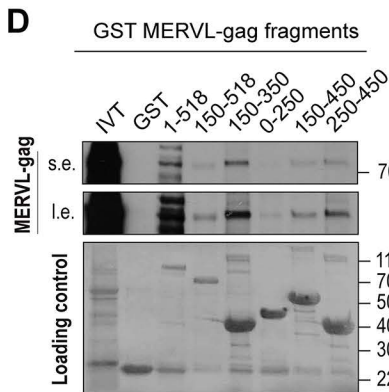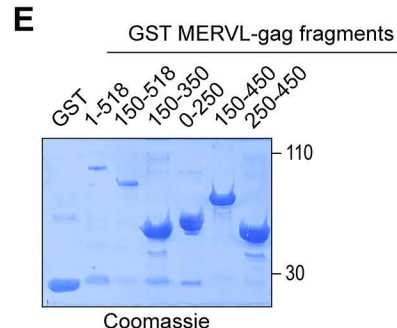

**F**

> MERVL-gag  
> HERVL-gag

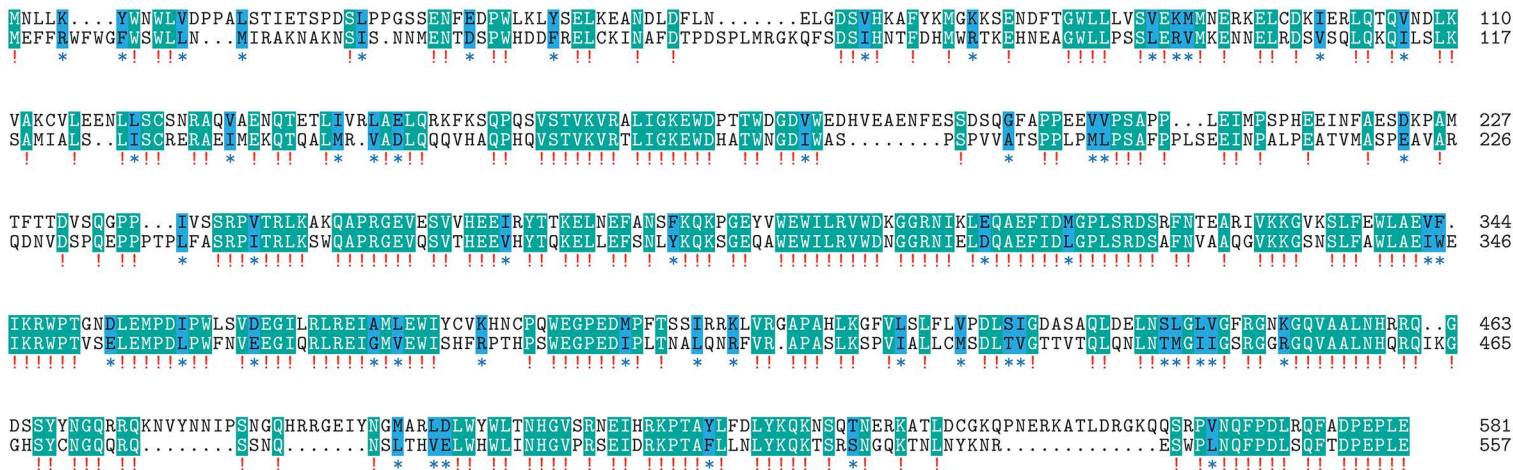

□ Non-conserved  
 ■ Similar  
 ■ Identical

47.47% Aa sequence identical in 1-518 fragment  
 72.73% Aa sequence identical in 250-350 fragment

**Fig. S9. URI interacts with MERVL-gag through a highly conserved region to the human counterpart transposon, HERVL.**

**A**, Pulldown of IVT URI, OCT4 and SOX2 proteins using GST or GST-MERVL-gag. s.e. and l.e. exposures are shown. **B**, Coomassie blue staining for purified MERVL-gag GST-fused protein. **C**, GST-fused MERVL-gag constructs strategy for pull down experiments. **D**, Pulldown of URI IVT using GST-fused MERVL-gag fragments from (C). **E**, Coomassie blue staining for purified MERVL-gag GST-fused fragments from (C). **F**, Sequence alignment between MERVL-gag and the reconstituted HERVL-gag protein.

## Supplementary tables

**Table S1. Accession numbers and references for NGS analysis.**

| Figure                  | NGS       | Dataset                                                          | Accession   | PMID                                |           |          |
|-------------------------|-----------|------------------------------------------------------------------|-------------|-------------------------------------|-----------|----------|
| Fig. 1C                 | RNA-seq   | Pre-implanted mouse embryos (bulk)                               | GSE45719    | 24408435                            |           |          |
| fig, S, 1D to G         | RNA-seq   | Single cell dataset for 2-cell embryos                           | E-MTAB-3321 | 27015307                            |           |          |
|                         |           |                                                                  | GSE57249    | 25096407                            |           |          |
| fig. S, 1K to Q         | RNA-seq   | Single cell dataset for 4-cell embryos                           | E-MTAB-3321 | 27015307                            |           |          |
|                         |           |                                                                  | GSE57249    | 25096407                            |           |          |
| fig. S, 1R and S        | ChIP-seq  | Pluripotent core factors: NANOG, SOX2, OCT4 and MED1 in mESCs    | GSE44286    | 23582322                            |           |          |
|                         | DNase-seq | Chromatin accessibility in ES cells by DNase I hypersensitivity  | GSE37074    | ENCODE                              |           |          |
| fig. S2A                | ATAC-seq  | Chromatin accessibility in embryos                               | GSE66581    | 27309802                            |           |          |
| fig. S2B                | DNase-seq | Chromatin accessibility in embryos by DNase I hypersensitivity   | GSE76642    | 27259149                            |           |          |
| fig. S2C                | ChIP-seq  | H3K4me3 and 27me3 in embryos                                     | GSE73952    | 27626379                            |           |          |
| Fig. 2, A and 2, D to H | RNA-seq   | Single cells datasets for morula and blastocysts                 | GSE45719    | 24408435                            |           |          |
| fig S2F                 | ChIP-seq  | H3K9me3, K27ac, K27me3, K79me2, K36me3, K4me1, K4me3 in ES cells | GSE90895    | 28111071                            |           |          |
|                         |           |                                                                  | ATAC-seq    | Chromatin accessibility in ES cells | GSE110950 | 31628347 |
|                         |           |                                                                  | ChIP-seq    | PolIII in ES cells                  | GSE145791 | 32616013 |
|                         |           |                                                                  | ChIP-seq    | H3K9ac in ES cells                  | GSE29184  | 22763441 |
| fig. S2G                | ChIP-seq  | H3K4me1, K27ac, K20me1 and K36me3 in TS cells                    | GSE39406    | 23178118                            |           |          |

|                                                 |          |                                                                         |             |          |
|-------------------------------------------------|----------|-------------------------------------------------------------------------|-------------|----------|
|                                                 | ChIP-seq | H3K4me3, K4me2 and 27me3 in TS cells                                    | GSE73952    | 27626379 |
|                                                 | ChIP-seq | H3K9me3 in TS cells                                                     | GSE97778    | 29686265 |
|                                                 | ATAC-seq | Chromatin accessibility in TS cells                                     | GSE110950   | 31628347 |
|                                                 | ChIP-seq | PolIII in TS cells                                                      | GSE39406    | 23178118 |
| fig. S2J                                        | ChIP-seq | TFs in ES cells: STAT3, KLF4, ESRRB, E2F1, NMYC, CMYC, ZFx and TCFCP2L1 | GSE66581    | 27309802 |
| fig. S2K                                        | ChIP-seq | CDX2 in TS cells                                                        | GSE42207    | 23396136 |
|                                                 | ChIP-seq | GATA2 and GATA3 in TS cells                                             | GSE92287    | 28232602 |
|                                                 | ChIP-seq | KLF5 in TS cells                                                        | GSE109250   | 31777916 |
|                                                 | ChIP-seq | ELF5, EOMES, ETS2, ID2, SMAD6, TFAP2C and TEAD4 in TS cells             | GSE110950   | 31628347 |
| Fig. 6, A to C,<br>and fig. S5, E<br>and M to O | RNA-seq  | Single cell isolated by Zscan4 reporter                                 | E-MTAB-5058 | 27681430 |
| Fig. 6, D to F                                  | RNA-seq  | Reporter for Dppa2 (GFP)                                                | GSE120950   | 30692203 |
|                                                 |          | Reporter for Dppa4 (GFP)                                                | GSE120950   | 30692203 |
|                                                 |          | Knockdown of Ncl (shRNA)                                                | GSE100939   | 29937225 |
|                                                 |          | Reporter for Sp110 (GFP)                                                | GSE120950   | 30692203 |
|                                                 |          | Knockout of METTL3                                                      | GSE146467   | 33658714 |
|                                                 |          | Knockdown of UBE2i (shRNA)                                              | GSE70863    | 26365490 |
|                                                 |          | Reporter for Usp3 (GFP)                                                 | GSE120950   | 30692203 |
|                                                 |          | Knockdown of UBA2 (shRNA)                                               | GSE70863    | 26365490 |
|                                                 |          | Knockout of SMCHD1                                                      | GSE126467   | 33523915 |
|                                                 |          | Treatment with 2-DG                                                     | GSE113671   | 31932739 |
|                                                 |          | Knockdown of SUMO2 (shRNA)                                              | GSE70863    | 26365490 |



|                             |             |          |
|-----------------------------|-------------|----------|
| Knockdown of TRIM28 (shRNA) | GSE70863    | 26365490 |
| Reporter for Bahd1 (GFP)    | GSE120950   | 30692203 |
| Reporter for Hdac9 (GFP)    | GSE120950   | 30692203 |
| Knockdown of SAE1 (shRNA)   | GSE70863    | 26365490 |
| Knockout of SMG7 (sgRNA)    | GSE133234   | 32523982 |
| Knockdown of LINE1 (ASO)    | GSE100939   | 9937225  |
| Knockout of ZMYM2           | GSE119819   | 32032525 |
| Overexpression DPPA2        | GSE127811   | 31226106 |
| Overexpression DCAF11       | GSE132746   | 33357405 |
| Knockout of KAP1            | GSE74278    | 27003935 |
| Knockdown of UBC9 (shRNA)   | GSE99009    | 30401455 |
| Knockout of YTHDC1          | GSE146467   | 33658714 |
| Reporter for Eya1 (GFP)     | GSE120950   | 30692203 |
| Knockout of TRF2            | GSE156534   | 33239785 |
| Knockout of LSD1            | GSE93952    | 33414108 |
| Knockout of ZFP57           | GSE123942   | 31399135 |
| Mutant for Tip60/Ep400      | GSE85505    | 28445719 |
| Knockout (triple) of H1     | GSE153620   | 34875212 |
| Knockout of DNMT1 (sgRNA)   | GSE121459   | 31209294 |
| Knockout of SUV39h          | GSE57092    | 24981170 |
| Reporter for Trp63 (GFP)    | GSE120950   | 30692203 |
| Reporter for Irf1 (GFP)     | GSE120950   | 30692203 |
| Treatment with aphidicolin  | PRJNA415135 | 32163370 |
| Knockout of SETDB1          | PRJNA544540 | 31914391 |
| Knockdown of SENP6 (shRNA)  | GSE70863    | 26365490 |
| Overexpression of NEFA      | GSE113671   | 31932739 |
| Knockout of miR-34a         | GSE69484    | 28082412 |

|                                                   |             |          |
|---------------------------------------------------|-------------|----------|
| Knockdown of CAF1 (p60) (shRNA)                   | E-MTAB-2684 | 26237512 |
| Reporter for Nefa (GFP)                           | GSE113671   | 31932739 |
| Knockout of KAP1                                  | GSE41903    | 23233547 |
| Reporter for Gata3 (GFP)                          | GSE120950   | 30692203 |
| Knockdown of RIF1a                                | GSE98255    | 29040764 |
| Knockout of MYC (sgRNA)                           | GSE121459   | 31209294 |
| Reporter for Zscan4 (Emerald)                     | GSE75751    | 27681430 |
| Knockdown of CAF1 p150 (shRNA)                    | E-MTAB-2684 | 26237512 |
| Reporter for Tox3 (GFP)                           | GSE120950   | 30692203 |
| Knockdown of RYBP (PRC1)                          | PRJNA604675 | 32203418 |
| Reporter for Zscan4 and MERVL-LTR                 | GSE75751    | 27681430 |
| Overexpression of DUX                             | GSE85627    | 28459457 |
| Knockdown of LSM4 (siRNA)                         | GSE168728   | 33991488 |
| Reporter for Zscan4 (Emerald)                     | GSE85627    | 28459457 |
| Knockdown of CAF1 p60 (shRNA)<br>vs. GFP negative | E-MTAB-2684 | 26237512 |
| Knockdown of ISY1 (siRNA)                         | GSE168728   | 33991488 |
| Knockdown of CHAF1b p60<br>(shRNA)                | GSE70863    | 26365490 |
| Reporter for 2C-like cells                        | E-MTAB-2684 | 26237512 |
| Reporter for 2C-like cells                        | GSE133234   | 32523982 |
| Knockdown of EFTUD2 (siRNA)                       | GSE168728   | 33991488 |
| Reporter for 2C-like cells                        | GSE121459   | 31209294 |
| Reporter for Zscan4 and MERVL-LTR                 | GSE119819   | 32032525 |
| Knockdown of SNRPB (siRNA)                        | GSE168728   | 33991488 |

|                          |                   |                                                                              |             |          |
|--------------------------|-------------------|------------------------------------------------------------------------------|-------------|----------|
|                          |                   | Knockdown of SNRPD2 (siRNA)                                                  | GSE168728   | 33991488 |
|                          |                   | Knockdown of CAF1 p150 (shRNA)<br>vs. GFP negative                           | E-MTAB-2684 | 26237512 |
|                          |                   | Knockdown of CHAF1a p150<br>(shRNA)                                          | GSE70863    | 26365490 |
| fig. S5F                 | RNA-seq           | Pooled 2C-like cells isolated by<br>Zscan4 and MERVL-LTR reporters           | GSE75751    | 27681430 |
| fig. S5, K and L         | ChIP-seq          | Epigenetic markers in 2C-like cells:<br>H3K4me3 and K27me3                   | GSE164486   | 33636112 |
|                          | ATAC-seq          | Chromatin accessibility in ES and<br>2C-like                                 | GSE75751    | 27681430 |
| Fig. 8, A and D          | RNA-seq           | Pooled microinjected MERVL-LTR<br>(MT2_Mm) CRISPR KO embryos at<br>4C stages | GSE242123   | 37781606 |
| Fig. 8, B, C, E<br>and F | RNA-seq           | Pooled microinjected MERVL KD<br>embryos at 4C stages                        | GSE196520   | 36864102 |
| Fig. 8, G and H          | ATAC-seq          | Pooled microinjected MERVL KD<br>embryos from at 2C and 4C stages            | GSE196520   | 36864102 |
|                          | ChIP-seq<br>peaks | Pluripotent core factors: SOX2,<br>OCT4 in mESCs                             | GSE44286    | 23582322 |

**Table S2. Gene signatures** (excel file)

List of genes used for enrichment analysis (provided as both ENSEMBL id and gene name)

**Table S3. Reagents used**

| <b>REAGENT or RESOURCE</b>                           | <b>SOURCE</b>       | <b>IDENTIFIER</b> |
|------------------------------------------------------|---------------------|-------------------|
| <b>Antibodies</b>                                    |                     |                   |
| Anti-CARM1 (3H2)                                     | NovusBio            | NBP2-37645        |
| Anti-CDX2                                            | BioGenex            | MU392A-UC         |
| Anti-cleaved Caspase-3 (CC3)<br>(Asp175)             | Cell Signaling      | 9661              |
| Anti-E-CADHERIN (36)                                 | BD Bio              | 610182            |
| Anti-goat Alexa Fluor 555                            | Invitrogen          | A21432            |
| Anti-GFP                                             | Genetex             | GTX113617         |
| Anti-H3 pan Ac                                       | Abcam               | ab47915           |
| Anti-H3 Total                                        | Abcam               | ab1791            |
| Anti-H3K4me3                                         | Abcam               | ab8580            |
| Anti-H3K9me3                                         | Abcam               | ab8898            |
| Anti-MERVL-gag                                       | NovusBio            | NBP2-66963        |
| Anti-mouse Alexa Fluor 488                           | Invitrogen          | A11001            |
| Anti-mouse Alexa Fluor 555                           | Invitrogen          | A21422            |
| Anti-mouse Alexa Fluor 647                           | Invitrogen          | A21235            |
| Anti-NANOG (D2A3)                                    | Cell Signaling      | 8822              |
| Anti-NANOG (SER211)                                  | In-home made (CNIO) | -                 |
| Anti-OCT4                                            | Abcam               | ab19857           |
| Anti-PARD6B                                          | SantaCruz           | sc-166405         |
| Anti-PODXL                                           | R&DSYSTEMS          | MAB1556           |
| Anti-rabbit Alexa Fluor 488                          | Invitrogen          | A11008            |
| Anti-rabbit Alexa Fluor 555                          | Invitrogen          | A21429            |
| Anti-rabbit Alexa Fluor 647                          | Invitrogen          | A21244            |
| Anti-rat Alexa Fluor 555                             | Invitrogen          | A21434            |
| Anti-SMARCC1 (BAF155)                                | Sigma               | HPA024352         |
| Anti-SOX2                                            | Abcam               | ab97959           |
| Anti-SOX2                                            | EBio                | 14-9811-80        |
| Anti-URI mAb or RbAb                                 | (26)                | -                 |
| Anti-VINCULIN (hVIN-1)                               | Sigma               | V9131             |
| Anti-ZSCAN4                                          | Sigma               | AB4340            |
| Anti- $\gamma$ -TUBULIN (GTU-88)                     | Sigma               | T6557             |
| <b>Chemicals, Peptides, and Recombinant Proteins</b> |                     |                   |
| 4-hydroxitamoxifen (4-OHT)                           | PeptoTech           | 6833585           |

|                                                                       |               |                       |
|-----------------------------------------------------------------------|---------------|-----------------------|
| B27 supplement                                                        | Gibco         | 17504044              |
| CHIR99021 (GSK3i)                                                     | Axon Medchem  | 1386                  |
| Doxycycline                                                           | Sigma         | D9891                 |
| Gelatin                                                               | Sigma         | G1890                 |
| Knock-out serum replacement (KSR)                                     | Gibco         | 10828010              |
| Matrigel                                                              | BD Bioscience | 356230                |
| MG132 Proteasome inhibitor                                            | Sigma         | M8699                 |
| Triptolide                                                            | Sigma         | T3652                 |
| N2 supplement                                                         | Gibco         | 17502048              |
| PD0325901 (MEKi)                                                      | Axon Medchem  | 1408                  |
| Reduced serum media Opti-MEM                                          | ThermoFisher  | 51985034              |
| hCG                                                                   | Sigma         | CG5                   |
| Hyaluronidase type IV-S                                               | Sigma         | H3884                 |
| KSOM media                                                            | Sigma         | MR-106-D              |
| M16 media                                                             | Sigma         | M7292                 |
| M2 medium                                                             | Sigma         | M7167                 |
| Paraffin mineral oil                                                  | Nidacon       | NO-100                |
| PMSG                                                                  | ProspecBio    | hor-272               |
| DAPI                                                                  | Sigma         | D9542                 |
| Hoechst                                                               | Sigma         | B2261                 |
| Mowiol 4-88                                                           | Sigma         | 81381                 |
| BL21 CodonPlus (DE3)-RIPL                                             | Agilent       | 230265                |
| Bradford                                                              | Biorad        | 5000006               |
| Dynabeads slurry protein A                                            | GE Healthcare | 17-1279-01            |
| Dynabeads slurry protein G                                            | GE Healthcare | 17-0618-01            |
| Glutathione Sepharose beads                                           | Cytiva        | GE17-5132-02          |
| TRIzol                                                                | Sigma         | 15596026              |
| BL21 CodonPlus (DE3)-RIPL                                             | Agilent       | 230265                |
| Control antisense oligonucleotide<br>(Antisense LNA GapmeR control)   | Qiagen        | 339515 LG00000002-DDA |
| <i>Uri</i> antisense oligonucleotide (URI1_1<br>Antisense LNA GapmeR) | Qiagen        | 339511 LG00800668-DDA |
| <i>Uri</i> antisense oligonucleotide (URI1_9<br>Antisense LNA GapmeR) | Qiagen        | 339511 LG00800676-DDA |
| Human adenovirus type 5 carrying Cre<br>and EGFP (AdV5-CMV-Cre-EGFP)  | VectorBioLabs | 1700                  |

Human adenovirus type 5 encoding VectorBioLabs 1060  
EGFP (AdV5-CMV-EGFP)

### Plasmids

|                                      |              |            |
|--------------------------------------|--------------|------------|
| pcDNA3.3-HA-OCT4                     | Addgene      | 26816      |
| pcDNA3.3-HA-SOX2                     | Addgene      | 26817      |
| pcDNA3.1-EF1 $\alpha$ -mURI          | This study   | -          |
| pcDNA3.1-EF1 $\alpha$ -MERVL-gag     | This study   | -          |
| pGEX4T-1-OCT4                        | Addgene      | 40633      |
| pGEX4T-1-SOX2                        | This study   | -          |
| pGEX4T-1-MERVL-gag (1-581 Aa)        | This study   | -          |
| pGEX4T-1-MERVL-gag (150-581 Aa)      | This study   | -          |
| pGEX4T-1-MERVL-gag (150-350 Aa)      | This study   | -          |
| pGEX4T-1-MERVL-gag (0-250 Aa)        | This study   | -          |
| pGEX4T-1-MERVL-gag (150-450 Aa)      | This study   | -          |
| pGEX4T-1-MERVL-gag (250-450 Aa)      | This study   | -          |
| pGEX4T-1-URI (1-158 Aa)              | (30)         | -          |
| pGEX4T-1-URI (1-267 Aa)              | (30)         | -          |
| pGEX4T-1-URI (1-518 Aa)              | (30)         | -          |
| pGEX4T-1-URI (1-535 Aa)              | (30)         | -          |
| pGEX4T-1-URI (156-283 Aa)            | (30)         | -          |
| pGEX4T-1-URI (156-535 Aa)            | (30)         | -          |
| pGEX4T-1-URI (282-535 Aa)            | (30)         | -          |
| pGEX4T-1-URI (390-535 Aa)            | (30)         | -          |
| pGEX4T-1-URI (466-535 Aa)            | (30)         | -          |
| pMERVL-LTR-tdTomato                  | Addgene      | 40281      |
| pMERVL-LTR-tdTomato-T2A-Cre          | This study   | This study |
| pZscan4-mEmerald-T2A-Cre             | This study   | This study |
| pSBbi-GN                             | Addgene      | 60517      |
| pZscan4-mEmerald                     | (56)         |            |
| tetO-FLAG-mDUX-hPGK-rtTA-T2A-<br>Neo | Addgene      | 138320     |
| tetO-mDUX-hPGK-Puro-T2A-rtTA         | Addgene      | 99284      |
| <b>Critical Commercial Assays</b>    |              |            |
| M-MLV Reverse Transcriptase          | Thermofisher | 28025013   |
| GoTaq qPCR Master Mix                | Promega      | A6002      |
| Mycoplasma PCR test kit              | Biontix      | 6833585    |



|                                                  |                      |                                                                                                                                                                 |
|--------------------------------------------------|----------------------|-----------------------------------------------------------------------------------------------------------------------------------------------------------------|
| Vectastain ABC HRP Kit (Peroxidase, Mouse IgG )  | Vector Laboratories  | PK-4002                                                                                                                                                         |
| Vectastain ABC HRP Kit (Peroxidase, Rabbit IgG ) | Vector Laboratories  | PK-4001                                                                                                                                                         |
| Liquid DAB + Substrate Chromogen System          | Dako                 | K3468                                                                                                                                                           |
| Reticulocyte lysate system                       | Promega              | L5010                                                                                                                                                           |
| GoTaq SYBR green master mix                      | Promega              | A6002                                                                                                                                                           |
| <b>Experimental Models: Cell Lines</b>           |                      |                                                                                                                                                                 |
| 293A cell line                                   | ThermoFisher         | R70507                                                                                                                                                          |
| Mouse embryonic fibroblast (MEFs)                | This study           | -                                                                                                                                                               |
| Mouse embryonic stem cells (mESCs)               | This study           | -                                                                                                                                                               |
| <b>Experimental Models: Organisms/Strains</b>    |                      |                                                                                                                                                                 |
| Mouse: C57BL/6                                   | CNIO Animal Facility | N/A                                                                                                                                                             |
| Mouse: Tg. CAG-Cre                               | (37)                 | MGI: 3586452                                                                                                                                                    |
| Mouse: Sox2-Cre, Edil3Tg(Sox2-Cre)1Amc           | (38)                 | MGI: 2656539                                                                                                                                                    |
| Mouse: UBQ-CreERT2, NdorTg(UBC-Cre/ERT2)1Ejb     | (50)                 | MGI: 123200                                                                                                                                                     |
| Mouse: Zp3-Cre, Tg(Zp3-Cre)93Knw                 | (40)                 | MGI: 2176187                                                                                                                                                    |
| Mouse: Uri_lox                                   | (30)                 | NR                                                                                                                                                              |
| <b>Oligonucleotides</b>                          |                      |                                                                                                                                                                 |
| Primers For Genotyping                           | This Paper, Table S4 | N/A                                                                                                                                                             |
| Primers For qRT-PCR                              | This Paper, Table S4 | N/A                                                                                                                                                             |
| <b>Software and Algorithms</b>                   |                      |                                                                                                                                                                 |
| ATACseqQC 1.26                                   | PMID: 29490630       | <a href="https://bioconductor.org/packages/release/bioc/html/ATACseqQC.html">https://bioconductor.org/packages/release/bioc/html/ATACseqQC.html</a>             |
| Bowtie2 2.4.4                                    | PMID: 19261174       | <a href="https://github.com/BenLangmead/bowtie2">https://github.com/BenLangmead/bowtie2</a>                                                                     |
| ClusterProfiler 4.4.2                            | PMID: 34557778       | <a href="https://bioconductor.org/packages/release/bioc/html/clusterProfiler.html">https://bioconductor.org/packages/release/bioc/html/clusterProfiler.html</a> |
| DeepTools 3.0.2                                  | PMID: 27079975       | <a href="https://deeptools.readthedocs.io/en/develop/">https://deeptools.readthedocs.io/en/develop/</a>                                                         |

|                      |                                                                                         |                                                                                                                                               |
|----------------------|-----------------------------------------------------------------------------------------|-----------------------------------------------------------------------------------------------------------------------------------------------|
| edgeR 4.0.2          | PMID: 19910308                                                                          | <a href="https://bioconductor.org/packages/release/bioc/html/edgeR">https://bioconductor.org/packages/release/bioc/html/edgeR</a>             |
| csaw 1.36            | PMID: 26578583                                                                          | <a href="https://bioconductor.org/packages/release/bioc/html/csaw">https://bioconductor.org/packages/release/bioc/html/csaw</a>               |
| Cutadapt 3.4.1       | PMID: 28715235                                                                          | <a href="https://github.com/marcelm/cutadapt">https://github.com/marcelm/cutadapt</a>                                                         |
| DESeq2 1.32          | PMID: 25516281                                                                          | <a href="https://bioconductor.org/packages/release/bioc/html/DESeq2.html">https://bioconductor.org/packages/release/bioc/html/DESeq2.html</a> |
| FastICA 1.2.3        | PMID: 10946390                                                                          | <a href="https://CRAN.R-project.org/package=fastICA">https://CRAN.R-project.org/package=fastICA</a>                                           |
| FastQC 0.11.8        | Babraham bioinformatics                                                                 | <a href="https://www.bioinformatics.babraham.ac.uk/projects/fastqc/">https://www.bioinformatics.babraham.ac.uk/projects/fastqc/</a>           |
| FIJI/ImageJ 1.53i    | PMID: 22743772                                                                          | <a href="https://imagej.net/software/fiji">https://imagej.net/software/fiji</a>                                                               |
| Galaxy project       | PMID: 35446428                                                                          | <a href="https://galaxyproject.org/">https://galaxyproject.org/</a>                                                                           |
| Ggplot2 3.3.6        | H. Wickham. ggplot2: Elegant Graphics for Data Analysis. Springer-Verlag New York, 2016 | <a href="https://CRAN.R-project.org/package=ggplot2">https://CRAN.R-project.org/package=ggplot2</a>                                           |
| GraphPad Prism 9.4.0 | GraphPad Software                                                                       | <a href="https://www.graphpad.com/scientific-software/prism/">https://www.graphpad.com/scientific-software/prism/</a>                         |
| HISAT2 2.1           | PMID: 25751142                                                                          | <a href="http://daehwankimlab.github.io/hisat2/">http://daehwankimlab.github.io/hisat2/</a>                                                   |
| HOMER 4.11           | PMID: 20513432                                                                          | <a href="http://homer.ucsd.edu/homer/index.html">http://homer.ucsd.edu/homer/index.html</a>                                                   |
| Illustrator 26.3.1   | Adobe                                                                                   | <a href="https://.adobe.com/products/illustrator.html">https://.adobe.com/products/illustrator.html</a>                                       |
| Imaris 8.4.1         | Bitplane                                                                                | <a href="http://www.bitplane.com/imaris/imaris">http://www.bitplane.com/imaris/imaris</a>                                                     |
| MACS2 2.1.1          | PMID: 18798982                                                                          | <a href="https://github.com/macs3-project/MACS">https://github.com/macs3-project/MACS</a>                                                     |

|                    |                                                                                                                                              |                                                                                                                                                               |
|--------------------|----------------------------------------------------------------------------------------------------------------------------------------------|---------------------------------------------------------------------------------------------------------------------------------------------------------------|
| msa 1.34           |                                                                                                                                              | <a href="https://bioconductor.org/packages/release/bioc/html/msa.html">https://bioconductor.org/packages/release/bioc/html/msa.html</a>                       |
| PcaMethods 1.88    | PMID: 17344241                                                                                                                               | <a href="https://www.bioconductor.org/packages/release/bioc/html/pcaMethods.html">https://www.bioconductor.org/packages/release/bioc/html/pcaMethods.html</a> |
| Photoshop 23.4.0   | Adobe                                                                                                                                        | <a href="https://adobe.com/products/photoshop.html">https://adobe.com/products/photoshop.html</a>                                                             |
| Picard 2.18.2      | Broad Institute                                                                                                                              | <a href="https://broadinstitute.github.io/picard/">https://broadinstitute.github.io/picard/</a>                                                               |
| Psych 2.2.5        | Revelle, W.R. Procedures for Psychological, Psychometric, and Personality Research. <i>Northwestern University, Evanston, Illinois, 2022</i> | <a href="https://CRAN.R-project.org/package=psych">https://CRAN.R-project.org/package=psych</a>                                                               |
| pyGenomeTracks 3.7 | PMID: 32745185                                                                                                                               | <a href="https://github.com/deeptools/pyGenomeTracks">https://github.com/deeptools/pyGenomeTracks</a>                                                         |
| R 4.1.0            | The R Foundation for Statistical Computing                                                                                                   | <a href="https://www.r-project.org/">https://www.r-project.org/</a>                                                                                           |
| RStudio 1.4.1717   | Integrated Development for R. RStudio                                                                                                        | <a href="https://www.rstudio.com/">https://www.rstudio.com/</a>                                                                                               |
| SAMtools 1.9       | PMID: 19505943                                                                                                                               | <a href="https://github.com/samtools/samtools">https://github.com/samtools/samtools</a>                                                                       |
| Seurat v5          | PMID: 37231261                                                                                                                               | <a href="https://cran.r-project.org/web/packages/Seurat/">https://cran.r-project.org/web/packages/Seurat/</a>                                                 |
| Sra-tools 2.11     | PMID: 21062823                                                                                                                               | <a href="https://github.com/ncbi/sra-tools">https://github.com/ncbi/sra-tools</a>                                                                             |
| ssGSEA 2.0         | PMID: 16199517                                                                                                                               | <a href="https://github.com/broadinstitute/ssGSEA2.0">https://github.com/broadinstitute/ssGSEA2.0</a>                                                         |
| Statmod 1.4.36     | PMID: 21044043                                                                                                                               | <a href="https://CRAN.R-project.org/package=statmod">https://CRAN.R-project.org/package=statmod</a>                                                           |
| StringTie2 2.2.2   | PMID: 31842956                                                                                                                               | <a href="https://ccb.jhu.edu/software/stringtie/">https://ccb.jhu.edu/software/stringtie/</a>                                                                 |

|                   |                         |                                                                                                                                         |
|-------------------|-------------------------|-----------------------------------------------------------------------------------------------------------------------------------------|
| Sva 3.44          | PMID: 16632515          | <a href="https://bioconductor.org/packages/release/bioc/html/sva.html">https://bioconductor.org/packages/release/bioc/html/sva.html</a> |
| Trim Galore 0.6.3 | Babraham bioinformatics | <a href="https://github.com/FelixKrueger/TrimGalore">https://github.com/FelixKrueger/TrimGalore</a>                                     |
| Trimmomatic 0.38  | PMID: 24695404          | <a href="http://usadellab.org/cms/?page=trimmomatic">http://usadellab.org/cms/?page=trimmomatic</a>                                     |

---

### Other

|                                                 |              |                 |
|-------------------------------------------------|--------------|-----------------|
| Dialysis cassette (10000 MWCO)                  | ThermoFisher | 66380           |
| Glass bottom 35mm dish                          | Ibidi        | 81158           |
| <i>In vitro</i> fertilization (IVF) multidishes | Sigma        | Z688754         |
| Digital sonifier                                | Branson      | S450D           |
| Electroporation Cuvettes (2mm gap)              | NepaGene     | EC-002S         |
| Fluorescence confocal microscopy                | Leica        | TCS SP5 WLL     |
| Fluorescence confocal microscopy                | Leica        | TCS SP8 MP      |
| Fluorescence microscopy                         | Olympus      | BX61            |
| Inverted phase-contrast microscope              | Leica        | DMIRE2          |
| Irradiator                                      | Theratronics | Gammacell 1000  |
| Manual pneumatic microinjector                  | Eppendorf    | CellTram 4r Oil |
| Microinjector for embryos                       | Eppendorf    | Femtojet 4i     |
| Micromanipulator for embryos                    | Eppendorf    | TransferMan 4r  |
| NEPA21 electroporator                           | NepaGene     | CU500           |
| Ultracentrifuge (SW28 rotor)                    | Beckman      | Avanti J-25     |
| Low protein-binding tubes                       | ThermoFisher | 90410           |

**Table S4. Primer sequences for genotyping and qRT-PCR**

| <b>Gene</b>      | <b>Technique</b> | <b>Sequence (5'-3')</b>   |
|------------------|------------------|---------------------------|
| Cre(Cpxm1)-F     | Genotyping       | CCATCTGCCACCAGCCAG        |
| Cre(Cpxm1)-R     | Genotyping       | TCGCCATCTTCCAGCAGG        |
| Cre-F            | Genotyping       | ACTGGGATCTTCGAACTCTTTGGAC |
| Cre-R            | Genotyping       | GATGTTGGGGCACTGCTCATTACCC |
| GFP-F            | Genotyping       | TGACCCTGAAGTTCATCTGCA     |
| GFP-R            | Genotyping       | TCACGAACTCCAGCAGGACCA     |
| Rosa26-rtTA-F    | Genotyping       | AAAGTCGCTCTGAGTTGTTAT     |
| Rosa26-rtTA-R1   | Genotyping       | GGAGCGGGAGAAATGGATATG     |
| Rosa26-rtTA-R2   | Genotyping       | GCGAAGAGTTTGTCTCAACC      |
| Sox2-Cre-F1      | Genotyping       | CTTGTGTAGAGTGATGGCTTGA    |
| Sox2-Cre-F2      | Genotyping       | TAGTGCCCCATTTTTGAAGG      |
| Sox2-Cre-R       | Genotyping       | CCAGTGCAGTGAAGCAAATC      |
| URI-delta-lox-F1 | Genotyping       | CGTGAAGAGAGGTGAAGAAC      |
| URI-delta-lox-F2 | Genotyping       | CCCTCTTGCCTTCATGCC        |
| URI-delta-lox-R  | Genotyping       | AAACACAAGTGTAATAATGTCCC   |
| mActin-F         | qRT-PCR          | CACAGCTGAGAGGGAAATCG      |
| mActin-R         | qRT-PCR          | AGTTTCATGGATGCCACAGG      |
| mGapdh-F         | qRT-PCR          | CGTCCCGTAGACAAAATGGT      |
| mGapdh-R         | qRT-PCR          | TCAATGAAGGGGTCGTTGAT      |
| Gm4340-F         | qRT-PCR          | CGAGGCACTGGGTCTAAGAG      |
| Gm4340-R         | qRT-PCR          | CCAATGAACAGGTCATGCTG      |
| mDub1-F          | qRT-PCR          | GGAGACATGGTGGTTGCTCT      |
| mDub1-R          | qRT-PCR          | CTCTCCCAACTCAGACTGTGC     |
| mDux-F           | qRT-PCR          | ACTTCTAGCCCCAGCGACTC      |
| mDux-R           | qRT-PCR          | CCATGCTGCCAGGATTTCTA      |

|             |         |                                |
|-------------|---------|--------------------------------|
| MERVL-LTR-F | qRT-PCR | CTCCATTACAGCTGCGACTG           |
| MERVL-LTR-R | qRT-PCR | CTAGAACCACTCCTGGTACCAAC        |
| MERVL-pol-F | qRT-PCR | CCCATCATGAGCTGGGTACT           |
| MERVL-pol-R | qRT-PCR | CGTGCAGAGCCATCAGTAAA           |
| mIAPEz-F    | qRT-PCR | CAGACTGGGAGGAAGAAGCA           |
| mIAPEz-R    | qRT-PCR | ATTGTTCCCTCACTGGCAAA           |
| mLINE1-F    | qRT-PCR | TTTGGGACACAATGAAAGCA           |
| mLINE1-R    | qRT-PCR | CTGCCGTCTACTCCTCTTGG           |
| MMERVK10C-F | qRT-PCR | CAAATAGCCCTACCATATGTCAG        |
| MMERVK10C-R | qRT-PCR | GTATACTTTCTTCTTCAGGTCCAC       |
| mNanog-F    | qRT-PCR | AGGGTCTGCTACTGAGATGCTCTG       |
| mNanog-R    | qRT-PCR | CAACCACTGGTTTTTCTGCCACCG       |
| mPou5f1-F   | qRT-PCR | CTGTAGGGAGGGCTTCGGGCACTT       |
| mPou5f1-R   | qRT-PCR | CTGAGGGCCAGGCAGGAGCACGAG       |
| mSox2- F    | qRT-PCR | GGCAGCTACAGCATGATGCAGGAGC      |
| mSox2- R    | qRT-PCR | CTGGTCATGGAGTTGTACTGCAGG       |
| mSp110-F    | qRT-PCR | AAGGATCCAGGAACCCCTTA           |
| mSp110-R    | qRT-PCR | GCATAGGCGATGTTACCTT            |
| mTestv1-F   | qRT-PCR | TGAACCCTGATGCCTGCTAAGACT       |
| mTestv1-R   | qRT-PCR | AGATGGCTGCAAAGACACAACCTGC      |
| mTestv3-F   | qRT-PCR | AGAAAGGGCTGGAACCTTGTGACCT      |
| mTestv3-R   | qRT-PCR | AAAGCTCTTTGAAGCCATGCCAG        |
| mZfp352-F   | qRT-PCR | AAAGCCTTGATCCTCAGGTG           |
| mZfp352-R   | qRT-PCR | GCCGAAGAGTTTTTCTGAGG           |
| mZscan4-F   | qRT-PCR | GAGATTCATGGAGAGTCTGACTGATGAGTG |
| mZscan4-R   | qRT-PCR | GCTGTTGTTTCAAAGCTTGATGACTTC    |
